# Supplementary material for: Loss of the BRCA1-Interacting Helicase BRIP1 Results in Abnormal Mammary Acinar Morphogenesis
Source: PubMed Central journal article supplement (PMC3765252; doi:10.1371/journal.pone.0074013), 2013-09-06
Supplement: pone.0074013.s003.pdf [file pone.0074013.s003.pdf]

**Table S1. Up- and down-regulated genes ( $\geq 2$ -fold,  $P < 0.05$ ) in 3D culture of *BRIP1*-knockdown cells compared with control cells at day 4**

| ProbeName    | GeneSymbol   | Description                                                                                                                                                           | GenbankAccession | Fold change |
|--------------|--------------|-----------------------------------------------------------------------------------------------------------------------------------------------------------------------|------------------|-------------|
| A_23_P257003 | PCSK5        | Homo sapiens proprotein convertase subtilisin/kexin type 5 (PCSK5), mRNA [NM_006200]                                                                                  | NM_006200        | 54.35       |
| A_23_P259741 | SATB1        | Homo sapiens SATB homeobox 1 (SATB1), transcript variant 1, mRNA [NM_002971]                                                                                          | NM_002971        | 12.91       |
| A_23_P101505 | KLK11        | Homo sapiens kallikrein-related peptidase 11 (KLK11), transcript variant 2, mRNA [NM_144947]                                                                          | NM_144947        | 8.89        |
| A_23_P29684  | VILL         | Homo sapiens villin-like (VILL), mRNA [NM_015873]                                                                                                                     | NM_015873        | 8.30        |
| A_23_P104188 | ELF3         | Homo sapiens E74-like factor 3 (ets domain transcription factor, epithelial-specific) (ELF3), transcript variant 1, mRNA [NM_004433]                                  | NM_004433        | 8.09        |
| A_23_P202881 | FEZ1         | Homo sapiens fasciculation and elongation protein zeta 1 (zygin I) (FEZ1), transcript variant 1, mRNA                                                                 | NM_005103        | 7.42        |
| A_23_P90453  | KRTDAP       | Homo sapiens keratinocyte differentiation-associated protein (KRTDAP), mRNA [NM_207392]                                                                               | NM_207392        | 6.93        |
| A_24_P159837 |              | Homo sapiens cDNA FLJ61137 complete cds, highly similar to Zinc finger protein 302. [AK297551]                                                                        | AK297551         | 6.18        |
| A_23_P202773 | C11orf20     | Homo sapiens chromosome 11 open reading frame 20 (C11orf20), mRNA [NM_001039496]                                                                                      | NM_001039496     | 5.97        |
| A_32_P405902 | C21orf15     | Homo sapiens chromosome 21 open reading frame 15 (C21orf15), non-coding RNA [NR_026755]                                                                               | NR_026755        | 4.77        |
| A_32_P107617 | SFTPD        | Homo sapiens surfactant protein D (SFTPD), mRNA [NM_003019]                                                                                                           | NM_003019        | 4.66        |
| A_24_P201552 | FEZ1         | Homo sapiens fasciculation and elongation protein zeta 1 (zygin I) (FEZ1), transcript variant 1, mRNA                                                                 | NM_005103        | 4.62        |
| A_23_P161297 | OGDHL        | Homo sapiens oxoglutarate dehydrogenase-like (OGDHL), nuclear gene encoding mitochondrial protein, transcript variant 1, mRNA [NM_018245]                             | NM_018245        | 4.53        |
| A_23_P57110  | C20orf54     | Homo sapiens chromosome 20 open reading frame 54 (C20orf54), mRNA [NM_033409]                                                                                         | NM_033409        | 4.43        |
| A_23_P107351 | LOC728392    | Homo sapiens hypothetical protein LOC728392 (LOC728392), mRNA [NM_001162371]                                                                                          | NM_001162371     | 3.97        |
| A_24_P501544 | YPEL2        | Homo sapiens yippeee-like 2 (Drosophila) (YPEL2), mRNA [NM_001005404]                                                                                                 | NM_001005404     | 3.95        |
| A_23_P142815 | ATP6V1B1     | Homo sapiens ATPase, H <sup>+</sup> transporting, lysosomal 56/58kDa, V1 subunit B1 (ATP6V1B1), mRNA                                                                  | NM_001692        | 3.91        |
| A_23_P383258 | GDA          | Homo sapiens guanine deaminase (GDA), mRNA [NM_004293]                                                                                                                | NM_004293        | 3.86        |
| A_32_P144999 |              | Q2Q5T5_MOUSE (Q2Q5T5) Embryonic stem cell-and germ cell-specific protein ESGP, complete                                                                               |                  | 3.82        |
| A_23_P348208 | SPRR1A       | Homo sapiens small proline-rich protein 1A (SPRR1A), mRNA [NM_005987]                                                                                                 | NM_005987        | 3.78        |
| A_24_P52697  | H19          | Homo sapiens H19, imprinted maternally expressed transcript (non-protein coding) (H19), non-coding RNA                                                                | NR_002196        | 3.76        |
| A_23_P152655 | ICAM2        | Homo sapiens intercellular adhesion molecule 2 (ICAM2), transcript variant 5, mRNA [NM_000873]                                                                        | NM_000873        | 3.67        |
| A_23_P8913   | CA2          | Homo sapiens carbonic anhydrase II (CA2), mRNA [NM_000067]                                                                                                            | NM_000067        | 3.65        |
| A_23_P209116 | CYP4F3       | Homo sapiens mRNA for leukotriene B4 omega-hydroxylase, complete cds. [AB002454]                                                                                      | AB002454         | 3.62        |
| A_23_P374339 | HIF3A        | Homo sapiens hypoxia inducible factor 3, alpha subunit (HIF3A), transcript variant 2, mRNA [NM_022462]                                                                | NM_022462        | 3.56        |
| A_23_P50710  | CYP4F2       | Homo sapiens cytochrome P450, family 4, subfamily F, polypeptide 2 (CYP4F2), mRNA [NM_001082]                                                                         | NM_001082        | 3.51        |
| A_23_P71268  | AZGP1        | Homo sapiens alpha-2-glycoprotein 1, zinc-binding (AZGP1), mRNA [NM_001185]                                                                                           | NM_001185        | 3.37        |
| A_32_P74771  |              |                                                                                                                                                                       |                  | 3.25        |
| A_23_P349147 | MUC3B        | Homo sapiens MUC3B mRNA for intestinal mucin, partial cds. [AB038783]                                                                                                 | AB038783         | 3.23        |
| A_32_P186364 |              | Homo sapiens cDNA clone IMAGE:5276765. [BC031314]                                                                                                                     | BC031314         | 3.19        |
| A_24_P393571 | GDA          | Homo sapiens guanine deaminase (GDA), mRNA [NM_004293]                                                                                                                | NM_004293        | 3.19        |
| A_32_P191648 | NIN          | AA742651 ny91d02.s1 NCI_CGAP_GCB1 Homo sapiens cDNA clone IMAGE:1285635 3', mRNA sequence                                                                             | AA742651         | 3.18        |
| A_23_P36018  | VSI2         | Homo sapiens V-set and immunoglobulin domain containing 2 (VSI2), mRNA [NM_014312]                                                                                    | NM_014312        | 3.13        |
| A_23_P130056 | LYZL6        | Homo sapiens lysozyme-like 6 (LYZL6), mRNA [NM_020426]                                                                                                                | NM_020426        | 3.12        |
| A_23_P71270  | AZGP1        | Homo sapiens alpha-2-glycoprotein 1, zinc-binding (AZGP1), mRNA [NM_001185]                                                                                           | NM_001185        | 3.11        |
| A_32_P68942  | C21orf81     | Homo sapiens chromosome 21 open reading frame 81 (C21orf81), non-coding RNA [NR_027270]                                                                               | NR_027270        | 3.07        |
| A_23_P303833 | SCN4B        | Homo sapiens sodium channel, voltage-gated, type IV, beta (SCN4B), transcript variant 1, mRNA [NM_174934]                                                             | NM_174934        | 3.06        |
| A_23_P33093  | ST6GALNACS5  | Homo sapiens ST6 (alpha-N-acetylneuraminyl-2,3-beta-galactosyl-1,3)-N-acetylgalactosaminide alpha-2,6-sialyltransferase 5 (ST6GALNACS5), mRNA [NM_030965]             | NM_030965        | 3.05        |
| A_23_P394986 | CREG2        | Homo sapiens cellular repressor of E1A-stimulated genes 2 (CREG2), mRNA [NM_153836]                                                                                   | NM_153836        | 3.02        |
| A_24_P307042 |              | Surfactant protein B-binding protein [Source:UniProtKB/TR/EMBL:Acc:Q9UD29] [ENST00000422824]                                                                          | L10404           | 3.01        |
| A_24_P262127 | RRAD         | Homo sapiens Ras-related associated with diabetes (RRAD), transcript variant 2, mRNA [NM_004165]                                                                      | NM_004165        | 2.99        |
| A_23_P395001 | SLC2A12      | Homo sapiens solute carrier family 2 (facilitated glucose transporter), member 12 (SLC2A12), mRNA                                                                     | NM_145176        | 2.99        |
| A_23_P331748 | CD33         | Homo sapiens CD33 molecule (CD33), transcript variant 1, mRNA [NM_001772]                                                                                             | NM_001772        | 2.98        |
| A_24_P118962 | NHEDC1       | Homo sapiens Na <sup>+</sup> /H <sup>+</sup> exchanger domain containing 1 (NHEDC1), transcript variant 1, mRNA [NM_139173]                                           | NM_139173        | 2.95        |
| A_23_P153489 | CLEC11A      | Homo sapiens C-type lectin domain family 11, member A (CLEC11A), mRNA [NM_002975]                                                                                     | NM_002975        | 2.94        |
| A_23_P115022 | TMEM125      | Homo sapiens transmembrane protein 125 (TMEM125), mRNA [NM_144626]                                                                                                    | NM_144626        | 2.93        |
| A_24_P849467 | ZNF585A      | Homo sapiens cDNA FLJ41302 fis, clone BRAMY2042122. [AK123296]                                                                                                        | AK123296         | 2.90        |
| A_23_P145786 | MLXIP        | Homo sapiens MLX interacting protein-like (MLXIP), transcript variant 1, mRNA [NM_032951]                                                                             | NM_032951        | 2.87        |
| A_24_P868247 | OCLN         | occludin [Source:HGNC Symbol;Acc:8104] [ENST00000355237]                                                                                                              | DQ786238         | 2.84        |
| A_24_P53595  | GNAS         | Homo sapiens GNAS complex locus (GNAS), transcript variant 4, mRNA [NM_016592]                                                                                        | NM_016592        | 2.84        |
| A_23_P154818 | C21orf15     | Homo sapiens mRNA; cDNA DKFZp686M2227 (from clone DKFZp686M2227). [BX648100]                                                                                          | BX648100         | 2.84        |
| A_24_P367439 | LOC440839    | Homo sapiens tigger transposable element derived 1 pseudogene (LOC440839), non-coding RNA                                                                             | NR_029399        | 2.84        |
| A_32_P162709 |              | full-length cDNA clone CS0DC002YA18 of Neuroblastoma Cot 25-normalized of Homo sapiens (human).                                                                       | CR624517         | 2.83        |
| A_24_P895836 |              | Homo sapiens, clone IMAGE:4720764, mRNA. [BC016022]                                                                                                                   | BC016022         | 2.80        |
| A_32_P71456  |              |                                                                                                                                                                       |                  | 2.76        |
| A_23_P50638  | LRG1         | Homo sapiens leucine-rich alpha-2-glycoprotein 1 (LRG1), mRNA [NM_052972]                                                                                             | NM_052972        | 2.76        |
| A_24_P204011 | FOXR1        | Homo sapiens forkhead box R1 (FOXR1), mRNA [NM_181721]                                                                                                                | NM_181721        | 2.74        |
| A_32_P168326 | ANKRD20A2    | Homo sapiens ankyrin repeat domain 20 family, member A2 (ANKRD20A2), mRNA [NM_001012421]                                                                              | NM_001012421     | 2.74        |
| A_23_P88849  | RRAD         | Homo sapiens Ras-related associated with diabetes (RRAD), transcript variant 2, mRNA [NM_004165]                                                                      | NM_004165        | 2.74        |
| A_24_P6125   | KCNJ4        | Homo sapiens potassium inwardly-rectifying channel, subfamily J, member 4 (KCNJ4), transcript variant 1, mRNA [NM_152868]                                             | NM_152868        | 2.74        |
| A_23_P157695 |              | AA609749 af17d08.s1 Soares_testis_NHT Homo sapiens cDNA clone IMAGE:1031919 3' similar to TR:G804804 G804804 HYPOTHETICAL 4.7 KD PROTEIN. ;, mRNA sequence [AA609749] | AA609749         | 2.73        |
| A_24_P862886 | DRD5         | Homo sapiens dopamine receptor D5 (DRD5), mRNA [NM_000798]                                                                                                            | NM_000798        | 2.73        |
| A_32_P81514  |              | full-length cDNA clone CS0DI036YE11 of Placenta Cot 25-normalized of Homo sapiens (human). [CR593784]                                                                 | CR593784         | 2.72        |
| A_24_P247587 | LOC348751    | Homo sapiens hypothetical protein LOC348751, mRNA (cDNA clone IMAGE:5311172). [BC039445]                                                                              | BC039445         | 2.71        |
| A_32_P172882 | FLJ41350     | Homo sapiens hypothetical protein LOC399806 (FLJ41350), non-coding RNA [NR_029380]                                                                                    | NR_029380        | 2.70        |
| A_23_P213336 | FGF1         | Homo sapiens fibroblast growth factor 1 (acidic) (FGF1), transcript variant 1, mRNA [NM_000800]                                                                       | NM_000800        | 2.70        |
| A_24_P315854 |              | Homo sapiens clone 20270+h7 immunoglobulin mu heavy chain mRNA, partial cds. [AY671312]                                                                               | AY671312         | 2.69        |
| A_23_P139986 | OXGR1        | Homo sapiens oxoglutarate (alpha-ketoglutarate) receptor 1 (OXGR1), mRNA [NM_080818]                                                                                  | NM_080818        | 2.69        |
| A_32_P132300 |              | Synthetic construct Homo sapiens gateway clone IMAGE:100021839 3' read MS4A6A mRNA. [CU692741]                                                                        | CU692741         | 2.69        |
| A_23_P79302  | LYPD6B       | Homo sapiens LY6/PLAUR domain containing 6B (LYPD6B), mRNA [NM_177964]                                                                                                | NM_177964        | 2.67        |
| A_24_P764690 | ZNF720       | full-length cDNA clone CS0DN002Y009 of Adult brain of Homo sapiens (human). [CR611323]                                                                                | CR611323         | 2.67        |
| A_23_P373017 | CCL3         | Homo sapiens mRNA for pLD78 peptide, complete cds. [D00044]                                                                                                           | D00044           | 2.66        |
| A_24_P332043 | SPAG17       | Homo sapiens sperm associated antigen 17 (SPAG17), mRNA [NM_206996]                                                                                                   | NM_206996        | 2.65        |
| A_24_P42140  |              |                                                                                                                                                                       |                  | 2.65        |
| A_24_P930418 | RBPMS        | Homo sapiens cDNA, FLJ17575. [AK310533]                                                                                                                               | AK310533         | 2.65        |
| A_24_P374943 | CXADR        | Homo sapiens coxsackie virus and adenovirus receptor (CXADR), mRNA [NM_001338]                                                                                        | NM_001338        | 2.63        |
| A_23_P99625  | FITM1        | Homo sapiens fat storage-inducing transmembrane protein 1 (FITM1), mRNA [NM_203402]                                                                                   | NM_203402        | 2.62        |
| A_23_P53370  | RND1         | Homo sapiens Rho family GTPase 1 (RND1), mRNA [NM_014470]                                                                                                             | NM_014470        | 2.62        |
| A_23_P2674   | KRT4         | Homo sapiens keratin 4 (KRT4), mRNA [NM_002272]                                                                                                                       | NM_002272        | 2.61        |
| A_23_P362798 | SLC30A8      | Homo sapiens solute carrier family 30 (zinc transporter), member 8 (SLC30A8), transcript variant 1, mRNA                                                              | NM_173851        | 2.59        |
| A_24_P144666 |              |                                                                                                                                                                       |                  | 2.58        |
| A_24_P360722 | DIP2C        | Homo sapiens DIP2 disco-interacting protein 2 homolog C (Drosophila) (DIP2C), mRNA [NM_014974]                                                                        | NM_014974        | 2.58        |
| A_23_P121665 | SORCS2       | Homo sapiens sortilin-related VPS10 domain containing receptor 2 (SORCS2), mRNA [NM_020777]                                                                           | NM_020777        | 2.58        |
| A_32_P921149 | LOC100129476 | Homo sapiens cDNA FLJ25733 fis, clone TST05652. [AK098599]                                                                                                            | AK098599         | 2.57        |
| A_32_P194887 |              |                                                                                                                                                                       |                  | 2.57        |
| A_24_P942296 | CNOT2        | Homo sapiens mRNA; cDNA DKFZp434M0572 (from clone DKFZp434M0572); partial cds. [AL137674]                                                                             | AL137674         | 2.57        |
| A_24_P296274 | NCRNA00052   | Homo sapiens non-protein coding RNA 52 (NCRNA00052), non-coding RNA [NR_026869]                                                                                       | NR_026869        | 2.56        |
| A_23_P89934  | MYH13        | Homo sapiens myosin, heavy chain 13, skeletal muscle (MYH13), mRNA [NM_003802]                                                                                        | NM_003802        | 2.56        |
| A_32_P217853 |              | 602039925F2 NCI_CGAP_Brn67 Homo sapiens cDNA clone IMAGE:4177446 5', mRNA sequence [BF527031]                                                                         | BF527031         | 2.55        |
| A_32_P213615 |              | Homo sapiens cDNA FLJ39459 fis, clone PROST2011439. [AK096778]                                                                                                        | AK096778         | 2.55        |
| A_32_P379467 | ISLR2        | Homo sapiens immunoglobulin superfamily containing leucine-rich repeat 2 (ISLR2), transcript variant 2, mRNA [NM_020851]                                              | NM_020851        | 2.55        |
| A_24_P37873  | ESM1         | Homo sapiens endothelial cell-specific molecule 1 (ESM1), transcript variant 1, mRNA [NM_007036]                                                                      | NM_007036        | 2.54        |
| A_23_P131060 | CYP4F8       | Homo sapiens cytochrome P450, family 4, subfamily F, polypeptide 8 (CYP4F8), mRNA [NM_007253]                                                                         | NM_007253        | 2.54        |

|              |                     |                                                                                                                                                                   |              |      |
|--------------|---------------------|-------------------------------------------------------------------------------------------------------------------------------------------------------------------|--------------|------|
| A_24_P160586 | <i>SERINC4</i>      | Homo sapiens cDNA FLJ40363 fis, clone TEST12034718, weakly similar to Mus musculus membrane protein TMS-2 mRNA, [AK097682]                                        | AK097682     | 2.53 |
| A_23_P312874 | <i>SPATS1</i>       | Homo sapiens spermatogenesis associated, serine-rich 1 (SPATS1), mRNA [NM_145026]                                                                                 | NM_145026    | 2.52 |
| A_23_P389500 | <i>REG1B</i>        | Homo sapiens regenerating islet-derived 1 beta (REG1B), mRNA [NM_006507]                                                                                          | NM_006507    | 2.52 |
| A_24_P167654 | <i>SLC8A3</i>       | Homo sapiens solute carrier family 8 (sodium/calcium exchanger), member 3 (SLC8A3), transcript variant c, mRNA [NM_183002]                                        | NM_183002    | 2.51 |
| A_23_P59960  | <i>CRISPLD1</i>     | Homo sapiens cysteine-rich secretory protein LCCL domain containing 1 (CRISPLD1), mRNA [NM_031461]                                                                | NM_031461    | 2.51 |
| A_32_P138652 |                     | Homo sapiens UQCF protein-like mRNA, complete sequence. [GQ870251]                                                                                                | GQ870251     | 2.51 |
| A_24_P531312 |                     | AA515157 ng68d08.s1 NCI_CGAP_Lip2 Homo sapiens cDNA clone IMAGE:939951 similar to contains Alu repetitive element;, mRNA sequence [AA515157]                      | AA515157     | 2.49 |
| A_23_P8497   | <i>GHRHR</i>        | Homo sapiens growth hormone releasing hormone receptor (GHRHR), transcript variant 1, mRNA                                                                        | NM_000823    | 2.49 |
| A_24_P932646 | <i>UNQ5830</i>      | Homo sapiens clone DNA149986 ALLT5830 (UNQ5830) mRNA, complete cds. [AY358123]                                                                                    | AY358123     | 2.48 |
| A_23_P19529  | <i>MLN</i>          | Homo sapiens molitin (MLN), transcript variant 2, mRNA [NM_001040109]                                                                                             | NM_001040109 | 2.47 |
| A_23_P15692  | <i>GPR172B</i>      | Homo sapiens G protein-coupled receptor 172B (GPR172B), transcript variant 2, mRNA [NM_017986]                                                                    | NM_017986    | 2.47 |
| A_24_P225534 | <i>RHBDL2</i>       | Homo sapiens rhomboid, veinlet-like 2 (Drosophila) (RHBDL2), mRNA [NM_017821]                                                                                     | NM_017821    | 2.45 |
| A_23_P422240 | <i>UROC1</i>        | Homo sapiens urocanase domain containing 1 (UROC1), transcript variant 1, mRNA [NM_144639]                                                                        | NM_144639    | 2.43 |
| A_23_P167509 | <i>CYFIP2</i>       | Homo sapiens cytoplasmic FMR1 interacting protein 2 (CYFIP2), transcript variant 2, mRNA [NM_001037332]                                                           | NM_001037332 | 2.43 |
| A_23_P152906 | <i>ALOX12</i>       | Homo sapiens arachidonate 12-lipoxygenase (ALOX12), mRNA [NM_000697]                                                                                              | NM_000697    | 2.42 |
| A_23_P257786 | <i>ECE2</i>         | Homo sapiens endothelin converting enzyme 2 (ECE2), transcript variant 1, mRNA [NM_014693]                                                                        | NM_014693    | 2.42 |
| A_24_P891472 |                     |                                                                                                                                                                   |              | 2.40 |
| A_24_P256219 | <i>MAF</i>          | Homo sapiens short form transcription factor C-MAF (c-maf) mRNA, complete cds. [AF055376]                                                                         | AF055376     | 2.40 |
| A_24_P646279 |                     | AW998865 PM4-BN0067-240300-001-e11 BN0067 Homo sapiens cDNA, mRNA sequence [AW998865]                                                                             | AW998865     | 2.39 |
| A_23_P21363  | <i>AHNAK</i>        | Homo sapiens AHNAK nucleoprotein (AHNAK), transcript variant 2, mRNA [NM_024060]                                                                                  | NM_024060    | 2.39 |
| A_23_P135486 | <i>AHSP</i>         | Homo sapiens alpha hemoglobin stabilizing protein (AHSP), mRNA [NM_016633]                                                                                        | NM_016633    | 2.38 |
| A_23_P32115  | <i>LCN12</i>        | Homo sapiens lipocalin 12 (LCN12), mRNA [NM_178536]                                                                                                               | NM_178536    | 2.38 |
| A_24_P693433 |                     | Homo sapiens cDNA FLJ12302 fis, clone MAMMA1001864. [AK022364]                                                                                                    | AK022364     | 2.38 |
| A_23_P252874 | <i>GPR116</i>       | Homo sapiens G protein-coupled receptor 116 (GPR116), transcript variant 1, mRNA [NM_015234]                                                                      | NM_015234    | 2.38 |
| A_32_P222106 |                     |                                                                                                                                                                   |              | 2.37 |
| A_32_P213469 |                     |                                                                                                                                                                   |              | 2.37 |
| A_24_P99175  | <i>ZDHHC22</i>      | Homo sapiens zinc finger, DHHC-type containing 22 (ZDHHC22), mRNA [NM_174976]                                                                                     | NM_174976    | 2.37 |
| A_32_P441492 |                     | Homo sapiens cDNA FLJ32062 fis, clone OCBBF1000042. [AK056624]                                                                                                    | AK056624     | 2.36 |
| A_23_P56050  | <i>TNNT1</i>        | Homo sapiens troponin T type 1 (skeletal, slow) (TNNT1), transcript variant 2, mRNA [NM_001126132]                                                                | NM_001126132 | 2.35 |
| A_23_P42746  | <i>NCF1</i>         | Homo sapiens neutrophil cytosolic factor 1 (NCF1), mRNA [NM_000265]                                                                                               | NM_000265    | 2.34 |
| A_32_P332317 |                     | Homo sapiens cDNA FLJ12532 fis, clone NT2RM4000200. [AK022594]                                                                                                    | AK022594     | 2.33 |
| A_23_P217269 | <i>VSIG4</i>        | Homo sapiens V-set and immunoglobulin domain containing 4 (VSIG4), transcript variant 1, mRNA                                                                     | NM_007268    | 2.32 |
| A_23_P99275  | <i>KLRB1</i>        | Homo sapiens killer cell lectin-like receptor subfamily B, member 1 (KLRB1), mRNA [NM_002258]                                                                     | NM_002258    | 2.32 |
| A_24_P920795 |                     | Q504S0_HUMAN (Q504S0) MGC3196 protein (Fragment, partial (49%)) [THC2529417]                                                                                      | BI771744     | 2.32 |
| A_24_P8165   | <i>SLC15A1</i>      | Homo sapiens mRNA for pH-sensing regulatory factor of peptide transporter, complete cds. [AB001328]                                                               | AB001328     | 2.32 |
| A_23_P312415 | <i>ADAMTSL1</i>     | Homo sapiens ADAMTS-like 1 (ADAMTSL1), transcript variant 2, mRNA [NM_052866]                                                                                     | NM_052866    | 2.31 |
| A_23_P10091  |                     |                                                                                                                                                                   |              | 2.31 |
| A_24_P119774 |                     | phosphoglycerate kinase [alternatively spliced] [human, phosphoglycerate kinase deficient patient with episodes of muscul, mRNA Partial Mutant, 307 nt]. [S81916] | S81916       | 2.30 |
| A_23_P111737 | <i>RAMP3</i>        | Homo sapiens receptor (G protein-coupled) activity modifying protein 3 (RAMP3), mRNA [NM_005856]                                                                  | NM_005856    | 2.30 |
| A_23_P122508 | <i>DPCCR1</i>       | Homo sapiens diffuse panbronchiolitis critical region 1 (DPCCR1), mRNA [NM_080870]                                                                                | NM_080870    | 2.30 |
| A_32_P709998 | <i>OTOP2</i>        | Homo sapiens otopetrin 2 (OTOP2), mRNA [NM_178160]                                                                                                                | NM_178160    | 2.29 |
| A_23_P59582  | <i>SEMA3E</i>       | Homo sapiens sema domain, immunoglobulin domain (Ig), short basic domain, secreted, (semaphorin) 3E (SEMA3E), mRNA [NM_012431]                                    | NM_012431    | 2.29 |
| A_24_P352388 | <i>CDHR5</i>        | Homo sapiens cadherin-related family member 5 (CDHR5), transcript variant 3, mRNA [NM_031264]                                                                     | NM_031264    | 2.28 |
| A_24_P196216 | <i>LOXHD1</i>       | Homo sapiens lipoxygenase homology domains 1 (LOXHD1), transcript variant 1, mRNA [NM_144612]                                                                     | NM_144612    | 2.28 |
| A_24_P323868 | <i>LOC100130456</i> | Homo sapiens cDNA FLJ37693 fis, clone BRHIP2014954. [AK095012]                                                                                                    | AK095012     | 2.27 |
| A_32_P384562 | <i>CROCCL2</i>      | Homo sapiens ciliary rootlet coiled-coil, rootlet-like 2 (CROCCL2), non-coding RNA [NR_023386]                                                                    | NR_023386    | 2.27 |
| A_23_P303238 | <i>VN1R5</i>        | Homo sapiens vomeronasal 1 receptor 5 (gene/pseudogene) (VN1R5), mRNA [NM_173858]                                                                                 | NM_173858    | 2.27 |
| A_23_P306859 | <i>ZIC4</i>         | Homo sapiens Zic family member 4 (ZIC4), transcript variant 3, mRNA [NM_032153]                                                                                   | NM_032153    | 2.27 |
| A_24_P203418 |                     | immunoglobulin heavy variable 2-70 [Source:HGNC Symbol;Acc:5577] [ENST00000390634]                                                                                | AF174045     | 2.26 |
| A_24_P21390  | <i>PLD1</i>         | Homo sapiens phospholipase D1, phosphatidylcholine-specific (PLD1), transcript variant 1, mRNA                                                                    | NM_002662    | 2.26 |
| A_24_P125561 | <i>SIGLEC9</i>      | Homo sapiens sialic acid binding Ig-like lectin 9 (SIGLEC9), mRNA [NM_014441]                                                                                     | NM_014441    | 2.25 |
| A_24_P102053 | <i>OCLN</i>         | Homo sapiens occludin (OCLN), mRNA [NM_002538]                                                                                                                    | NM_002538    | 2.25 |
| A_24_P945375 |                     |                                                                                                                                                                   |              | 2.25 |
| A_24_P349807 | <i>FAM71E2</i>      | Homo sapiens family with sequence similarity 71, member E2 (FAM71E2), mRNA [NM_001145402]                                                                         | NM_001145402 | 2.25 |
| A_32_P155832 |                     |                                                                                                                                                                   |              | 2.24 |
| A_32_P914221 | <i>USH1G</i>        | Homo sapiens Usher syndrome 1G (autosomal recessive) (USH1G), mRNA [NM_173477]                                                                                    | NM_173477    | 2.24 |
| A_23_P391946 | <i>C18orf15</i>     | Homo sapiens cDNA FLJ31338 fis, clone MAMGL1000184. [AK055900]                                                                                                    | AK055900     | 2.24 |
| A_24_P374532 | <i>RIMS4</i>        | Homo sapiens regulating synaptic membrane exocytosis 4 (RIMS4), mRNA [NM_182970]                                                                                  | NM_182970    | 2.23 |
| A_23_P383009 | <i>IGFBP5</i>       | Homo sapiens insulin-like growth factor binding protein 5 (IGFBP5), mRNA [NM_000599]                                                                              | NM_000599    | 2.22 |
| A_23_P217341 | <i>MAGEB1</i>       | Homo sapiens melanoma antigen family B, 1 (MAGEB1), transcript variant 1, mRNA [NM_002363]                                                                        | NM_002363    | 2.22 |
| A_23_P320261 | <i>DMKN</i>         | Homo sapiens dermokine (DMKN), transcript variant 1, mRNA [NM_001035516]                                                                                          | NM_001035516 | 2.21 |
| A_24_P919224 |                     |                                                                                                                                                                   |              | 2.21 |
| A_23_P26582  | <i>GNAO1</i>        | Homo sapiens guanine nucleotide binding protein (G protein), alpha activating activity polypeptide O (GNAO1), transcript variant 1, mRNA [NM_020988]              | NM_020988    | 2.21 |
| A_23_P145336 | <i>HLA-DRB3</i>     | Human MHC class II HLA-DR-beta mRNA (DR3), partial cds. [M17380]                                                                                                  | M17380       | 2.20 |
| A_23_P66073  |                     | Homo sapiens PRO0806 mRNA, complete cds. [AF113013]                                                                                                               | AF113013     | 2.20 |
| A_24_P910688 | <i>C19orf67</i>     | UPF0575 protein C19orf67 [Source:UniProtKB/Swiss-Prot;Acc:A6NJJ6] [ENST00000343945]                                                                               | XM_929382    | 2.20 |
| A_32_P90730  |                     | BX110500 Soares_pregnant_uterus_NbHPU Homo sapiens cDNA clone IMGp998G171156, mRNA sequence [BX110500]                                                            | BX110500     | 2.20 |
| A_32_P199220 |                     | Homo sapiens cDNA FLJ30583 fis, clone BRAWH2007406. [AK055145]                                                                                                    | AK055145     | 2.19 |
| A_23_P28772  | <i>DBNDD2</i>       | Homo sapiens dysbindin (dystrobrevin binding protein 1) domain containing 2 (DBNDD2), transcript variant 6, mRNA [NM_001048226]                                   | NM_001048226 | 2.19 |
| A_23_P156550 |                     | triggering receptor expressed on myeloid cells-like 1 [Source:HGNC Symbol;Acc:20434] [ENST00000437044]                                                            | AY358357     | 2.19 |
| A_24_P922430 |                     |                                                                                                                                                                   |              | 2.19 |
| A_32_P121751 |                     | Q5SLK5_THET8 (Q5SLK5) 2-oxoglutarate dehydrogenase E2 component (Dihydroliipoamide succinyltransferase), partial (5%) [THC2765213]                                |              | 2.17 |
| A_32_P210168 | <i>C15orf59</i>     | Homo sapiens chromosome 15 open reading frame 59 (C15orf59), mRNA [NM_001039614]                                                                                  | NM_001039614 | 2.16 |
| A_24_P239515 |                     | Homo sapiens cDNA clone IMAGE:4818334. [BC045731]                                                                                                                 | BC045731     | 2.16 |
| A_23_P201687 | <i>HES2</i>         | Homo sapiens hairy and enhancer of split 2 (Drosophila), mRNA (cDNA clone IMAGE:4634002), complete cds. [BC012091]                                                | BC012091     | 2.15 |
| A_32_P26461  |                     | BX112876 NCI_CGAP_Co8 Homo sapiens cDNA clone IMGp998D133952, mRNA sequence [BX112876]                                                                            | BX112876     | 2.15 |
| A_24_P557351 |                     | Homo sapiens, clone IMAGE:3344449, mRNA. [BC025324]                                                                                                               | BC025324     | 2.15 |
| A_23_P408285 | <i>PRICKLE1</i>     | Homo sapiens prickle homolog 1 (Drosophila) (PRICKLE1), transcript variant 1, mRNA [NM_153026]                                                                    | NM_153026    | 2.15 |
| A_24_P44453  | <i>DUOXA1</i>       | Homo sapiens cDNA FLJ32334 fis, clone PROST2005426. [AK056896]                                                                                                    | AK056896     | 2.14 |
| A_23_P115726 | <i>SLC16A9</i>      | Homo sapiens solute carrier family 16, member 9 (monocarboxylic acid transporter 9) (SLC16A9), mRNA                                                               | NM_194298    | 2.14 |
| A_32_P102935 | <i>SPDYA</i>        | Homo sapiens speedy homolog A (Xenopus laevis) (SPDYA), transcript variant 2, mRNA [NM_001008779]                                                                 | NM_001008779 | 2.14 |
| A_32_P53093  |                     | Q3JKQ7_BURP1 (Q3JKQ7) ScIT, partial (4%) [THC2664135]                                                                                                             |              | 2.14 |
| A_24_P247902 | <i>PCLO</i>         | Homo sapiens piccolo (presynaptic cytomatrix protein) (PCLO), transcript variant 2, mRNA [NM_014510]                                                              | NM_014510    | 2.13 |
| A_24_P923432 |                     | UI-H-B1-abx-a-01-UI.s1 NCI_CGAP_Sub3 Homo sapiens cDNA clone IMAGE:2713225 3', mRNA sequence [AW138500]                                                           | AW138500     | 2.13 |
| A_24_P881562 |                     |                                                                                                                                                                   |              | 2.13 |
| A_23_P113738 |                     | Homo sapiens CES hBr3 mRNA for brain carboxylesterase hBr3, complete cds. [AB025028]                                                                              | AB025028     | 2.12 |
| A_32_P45285  |                     |                                                                                                                                                                   |              | 2.12 |
| A_32_P212939 | <i>ZNF726</i>       | zinc finger protein 726 [Source:HGNC Symbol;Acc:32462] [ENST00000322487]                                                                                          | XM_001726951 | 2.11 |
| A_23_P307955 | <i>SIRT5</i>        | Homo sapiens sirtuin (silent mating type information regulation 2 homolog) 5 (S. cerevisiae) (SIRT5), transcript variant 2, mRNA [NM_031244]                      | NM_031244    | 2.11 |
| A_23_P68669  | <i>CHODL</i>        | Homo sapiens chondrolectin (CHODL), mRNA [NM_024944]                                                                                                              | NM_024944    | 2.11 |
| A_24_P887857 |                     |                                                                                                                                                                   |              | 2.11 |

|              |              |                                                                                                                                                                 |              |       |
|--------------|--------------|-----------------------------------------------------------------------------------------------------------------------------------------------------------------|--------------|-------|
| A_23_P201863 | CDK18        | Homo sapiens cyclin-dependent kinase 18 (CDK18), transcript variant 1, mRNA [NM_212503]                                                                         | NM_212503    | 2.10  |
| A_23_P82775  | SOX17        | Homo sapiens SRY (sex determining region Y)-box 17 (SOX17), mRNA [NM_022454]                                                                                    | NM_022454    | 2.10  |
| A_24_P801825 |              |                                                                                                                                                                 |              | 2.10  |
| A_23_P78265  | KRT33A       | Homo sapiens keratin 33A (KRT33A), mRNA [NM_004138]                                                                                                             | NM_004138    | 2.10  |
| A_24_P289265 |              | ATP-binding cassette, sub-family A (ABC1), member 1 [Source:HGNC Symbol;Acc:29] [ENST00000341579]                                                               | AK024328     | 2.10  |
| A_23_P102634 | WFDC6        | Homo sapiens WAP four-disulfide core domain 6 (WFDC6), mRNA [NM_080827]                                                                                         | NM_080827    | 2.10  |
| A_23_P351757 | PLCD3        | Homo sapiens phospholipase C, delta 3 (PLCD3), mRNA [NM_133373]                                                                                                 | NM_133373    | 2.10  |
| A_24_P467871 |              |                                                                                                                                                                 |              | 2.09  |
| A_23_P1473   | PRF1         | Homo sapiens perforin 1 (pore forming protein) (PRF1), transcript variant 1, mRNA [NM_005041]                                                                   | NM_005041    | 2.09  |
| A_24_P492885 |              |                                                                                                                                                                 |              | 2.09  |
| A_23_P315425 | FLJ31958     | Homo sapiens cDNA FLJ31958 fis, clone NT2RP7007406. [AK056520]                                                                                                  | AK056520     | 2.09  |
| A_32_P469683 |              | Homo sapiens clone FLB5227 PRO1367 mRNA, complete cds. [AF130056]                                                                                               | AF130056     | 2.09  |
| A_23_P691979 | LEPREL1      | Homo sapiens leprecan-like 1 (LEPREL1), transcript variant 1, mRNA [NM_018192]                                                                                  | NM_018192    | 2.09  |
| A_24_P24371  |              | immunoglobulin heavy constant gamma 4 (G4m marker) [Source:HGNC Symbol;Acc:5528]                                                                                | AJ294733     | 2.08  |
| A_23_P57020  | GTSF1L       | Homo sapiens gametocyte specific factor 1-like (GTSF1L), transcript variant 2, mRNA [NM_001008901]                                                              | NM_001008901 | 2.08  |
| A_23_P137751 | FAM46C       | Homo sapiens family with sequence similarity 46, member C (FAM46C), mRNA [NM_017709]                                                                            | NM_017709    | 2.08  |
| A_23_P78543  | AP1M2        | Homo sapiens adaptor-related protein complex 1, mu 2 subunit (AP1M2), mRNA [NM_005498]                                                                          | NM_005498    | 2.08  |
| A_23_P376704 | CIDEA        | Homo sapiens cell death-inducing DFFA-like effector A (CIDEA), transcript variant 2, mRNA [NM_198289]                                                           | NM_198289    | 2.07  |
| A_24_P363609 | IRF5         | Homo sapiens interferon regulatory factor 5 (IRF5), transcript variant 3, mRNA [NM_001098627]                                                                   | NM_001098627 | 2.06  |
| A_23_P13455  | OR51A7       | Homo sapiens olfactory receptor, family 51, subfamily A, member 7 (OR51A7), mRNA [NM_001004749]                                                                 | NM_001004749 | 2.06  |
| A_23_P145978 | VIPR2        | Homo sapiens vasoactive intestinal peptide receptor 2 (VIPR2), mRNA [NM_003382]                                                                                 | NM_003382    | 2.05  |
| A_24_P911718 |              | Homo sapiens cDNA clone IMAGE:5278089. [BC037919]                                                                                                               | BC037919     | 2.05  |
| A_23_P167464 |              | Homo sapiens cDNA FLJ12078 fis, clone HEMBB1002457. [AK022140]                                                                                                  | AK022140     | 2.05  |
| A_23_P153185 | SERPINB2     | Homo sapiens serpin peptidase inhibitor, clade B (ovalbumin), member 2 (SERPINB2), transcript variant 1, mRNA [NM_001143818]                                    | NM_001143818 | 2.05  |
| A_23_P52868  | OR8G2        | Homo sapiens olfactory receptor, family 8, subfamily G, member 2, mRNA (cDNA clone MGC:168251 IMAGE:902628), complete cds. [BC136638]                           | BC136638     | 2.05  |
| A_24_P67741  | LOC100131554 | CDNA: FLJ23120 fis, clone LNG07989HCG1987724 ; [Source:UniProtKB/TrEMBL;Acc:Q9H5S2]                                                                             | AK026773     | 2.04  |
| A_24_P126406 | DNAH17       | Homo sapiens dynein, axonemal, heavy chain 17 (DNAH17), mRNA [NM_173628]                                                                                        | NM_173628    | 2.04  |
| A_24_P464701 |              |                                                                                                                                                                 |              | 2.04  |
| A_23_P92672  | OCLN         | Homo sapiens occludin (OCLN), mRNA [NM_002538]                                                                                                                  | NM_002538    | 2.04  |
| A_24_P410610 | DPYD         | Homo sapiens dihydropyrimidine dehydrogenase (DPYD), transcript variant 2, mRNA [NM_001160301]                                                                  | NM_001160301 | 2.03  |
| A_32_P21848  |              | ALU5_HUMAN (P39192) Alu subfamily SC sequence contamination warning entry, partial (5%) [THC2716178]                                                            |              | 2.03  |
| A_24_P332651 | LOC650157    | PREDICTED: Homo sapiens similar to TRIM5/CypA fusion protein (LOC650157), mRNA [XM_001726994]                                                                   | XM_001726994 | 2.03  |
| A_32_P15544  | PRIMA1       | Homo sapiens proline rich membrane anchor 1 (PRIMA1), mRNA [NM_178013]                                                                                          | NM_178013    | 2.02  |
| A_23_P500501 | FGFR3        | Homo sapiens fibroblast growth factor receptor 3 (FGFR3), transcript variant 1, mRNA [NM_000142]                                                                | NM_000142    | 2.02  |
| A_23_P72330  |              |                                                                                                                                                                 |              | 2.02  |
| A_23_P308042 | C6orf195     | Homo sapiens chromosome 6 open reading frame 195 (C6orf195), mRNA [NM_152554]                                                                                   | NM_152554    | 2.02  |
| A_32_P46571  | RHBDL2       | Homo sapiens rhomboid, veinlet-like 2 (Drosophila) (RHBDL2), mRNA [NM_017821]                                                                                   | NM_017821    | 2.02  |
| A_32_P10886  | C6orf52      | Homo sapiens chromosome 6 open reading frame 52 (C6orf52), transcript variant 1, mRNA [NM_001145020]                                                            | NM_001145020 | 2.02  |
| A_24_P478745 |              | fh11b09.y1 NIH_MGC_17 Homo sapiens cDNA clone IMAGE:2964448 3', mRNA sequence [AW411241]                                                                        | AW411241     | 2.02  |
| A_23_P93940  | PGAM2        | Homo sapiens phosphoglycerate mutase 2 (muscle) (PGAM2), mRNA [NM_000290]                                                                                       | NM_000290    | 2.02  |
| A_23_P133637 | HTR4         | Homo sapiens 5-hydroxytryptamine (serotonin) receptor 4 (HTR4), transcript variant d, mRNA [NM_001040171]                                                       | NM_001040171 | 2.01  |
| A_23_P84230  | OTP          | Homo sapiens orthopedia homeobox (OTP), mRNA [NM_032109]                                                                                                        | NM_032109    | 2.01  |
| A_24_P943263 | RASA4        | Homo sapiens RAS p21 protein activator 4 (RASA4), transcript variant 1, mRNA [NM_006989]                                                                        | NM_006989    | 2.01  |
| A_23_P49448  | FA2H         | Homo sapiens fatty acid 2-hydroxylase (FA2H), mRNA [NM_024306]                                                                                                  | NM_024306    | 2.01  |
| A_32_P99399  |              |                                                                                                                                                                 |              | 2.00  |
| A_32_P88163  |              | ALU5_HUMAN (P39192) Alu subfamily SC sequence contamination warning entry, partial (9%) [THC2633438]                                                            |              | -2.00 |
| A_23_P140316 | GPR137C      | Homo sapiens G protein-coupled receptor 137C (GPR137C), mRNA [NM_001099652]                                                                                     | NM_001099652 | -2.01 |
| A_24_P229447 |              | Putative uncharacterized protein ENSP00000346720 Fragment [Source:UniProtKB/TrEMBL;Acc:A6NG04] [ENST00000345689]                                                | AY944711     | -2.01 |
| A_24_P62668  | SERTAD4      | SERTA domain containing 4 [Source:HGNC Symbol;Acc:25236] [ENST00000367012]                                                                                      | AK021425     | -2.01 |
| A_32_P220109 |              | BE924986 MR1-AN0036-280800-002-408 AN0036 Homo sapiens cDNA, mRNA sequence [BE924986]                                                                           | BE924986     | -2.03 |
| A_24_P257511 | BHMT         | Homo sapiens betaine-homocysteine methyltransferase (BHMT), mRNA [NM_001713]                                                                                    | NM_001713    | -2.03 |
| A_23_P434968 | KLF17        | Homo sapiens Kruppel-like factor 17 (KLF17), mRNA [NM_173484]                                                                                                   | NM_173484    | -2.04 |
| A_23_P14083  | AMIGO2       | Homo sapiens adhesion molecule with Ig-like domain 2 (AMIGO2), transcript variant 2, mRNA [NM_181847]                                                           | NM_181847    | -2.05 |
| A_24_P396753 | TRIB2        | Homo sapiens tribbles homolog 2 (Drosophila) (TRIB2), transcript variant 1, mRNA [NM_021643]                                                                    | NM_021643    | -2.05 |
| A_23_P67799  | TMEM37       | Homo sapiens transmembrane protein 37 (TMEM37), mRNA [NM_183240]                                                                                                | NM_183240    | -2.06 |
| A_23_P51082  |              | ALU1_HUMAN (P39188) Alu subfamily J sequence contamination warning entry, partial (4%) [THC2488254]                                                             |              | -2.07 |
| A_23_P167066 | UGDH         | Homo sapiens UDP-glucose dehydrogenase (UGDH), mRNA [NM_003359]                                                                                                 | NM_003359    | -2.07 |
| A_23_P209625 | CYP1B1       | Homo sapiens cytochrome P450, family 1, subfamily B, polypeptide 1 (CYP1B1), mRNA [NM_000104]                                                                   | NM_000104    | -2.07 |
| A_23_P156431 | MAN1A1       | Homo sapiens mannosidase, alpha, class 1A, member 1 (MAN1A1), mRNA [NM_005907]                                                                                  | NM_005907    | -2.08 |
| A_24_P342670 | GON4L        | Homo sapiens cDNA: FLJ23040 fis, clone LNG02277. [AK026693]                                                                                                     | AK026693     | -2.09 |
| A_32_P125338 | FAM43B       | Homo sapiens family with sequence similarity 43, member B (FAM43B), mRNA [NM_207334]                                                                            | NM_207334    | -2.09 |
| A_32_P184746 |              | BX090390 Soares fetal liver spleen 1NFLS Homo sapiens cDNA clone IMAGP998110652 ; IMAGE:292689, mRNA sequence [BX090390]                                        | BX090390     | -2.09 |
| A_24_P362805 | GK5          | Homo sapiens glycerol kinase 5 (putative) (GK5), transcript variant 2, non-coding RNA [NR_033289]                                                               | NR_033289    | -2.10 |
| A_23_P133536 | CAPSL        | Homo sapiens calcyphosine-like (CAPSL), transcript variant 1, mRNA [NM_144647]                                                                                  | NM_144647    | -2.12 |
| A_32_P135634 |              | Q2RZ67_SALRD (Q2RZ67) Glycosyl transferase, group 1 family protein , partial (6%) [THC2643352]                                                                  |              | -2.12 |
| A_23_P145606 | CHRM2        | Homo sapiens cholinergic receptor, muscarinic 2 (CHRM2), transcript variant 1, mRNA [NM_001006630]                                                              | NM_001006630 | -2.12 |
| A_23_P47148  | NOX4         | Homo sapiens NADPH oxidase 4 (NOX4), transcript variant 1, mRNA [NM_016931]                                                                                     | NM_016931    | -2.13 |
| A_24_P910255 |              |                                                                                                                                                                 |              | -2.13 |
| A_23_P13740  | NAV3         | Homo sapiens neuron navigator 3 (NAV3), mRNA [NM_014903]                                                                                                        | NM_014903    | -2.13 |
| A_24_P68006  | MOBK12B      | Homo sapiens cDNA FLJ23916 fis, clone COL00117. [AK172755]                                                                                                      | AK172755     | -2.14 |
| A_23_P351215 | SKIL         | Homo sapiens SKI-like oncogene (SKIL), transcript variant 1, mRNA [NM_005414]                                                                                   | NM_005414    | -2.15 |
| A_23_P202013 | ZEB1         | Homo sapiens zinc finger E-box binding homeobox 1 (ZEB1), transcript variant 2, mRNA [NM_030751]                                                                | NM_030751    | -2.15 |
| A_23_P112634 | C4orf34      | Homo sapiens chromosome 4 open reading frame 34 (C4orf34), mRNA [NM_174921]                                                                                     | NM_174921    | -2.15 |
| A_23_P156928 | GPLD1        | Homo sapiens glycosylphosphatidylinositol specific phospholipase D1 (GPLD1), transcript variant 1, mRNA                                                         | NM_001503    | -2.15 |
| A_32_P167111 |              |                                                                                                                                                                 |              | -2.15 |
| A_24_P196188 | NXPH4        | Homo sapiens neurexophilin 4 (NXPH4), mRNA [NM_007224]                                                                                                          | NM_007224    | -2.15 |
| A_24_P689119 |              |                                                                                                                                                                 |              | -2.16 |
| A_24_P123119 | EHHADH       | Homo sapiens enoyl-Coenzyme A, hydratase/3-hydroxyacyl Coenzyme A dehydrogenase (EHHADH), transcript variant 1, mRNA [NM_001966]                                | NM_001966    | -2.17 |
| A_23_P65918  | ITPKA        | Homo sapiens inositol 1,4,5-trisphosphate 3-kinase A (ITPKA), mRNA [NM_002220]                                                                                  | NM_002220    | -2.17 |
| A_23_P301925 | COX1         | Cytochrome c oxidase subunit 1 (EC 1.9.3.1)(Cytochrome c oxidase polypeptide I) [Source:UniProtKB/Swiss-Prot;Acc:P00395] [ENST00000361624]                      | CR606568     | -2.17 |
| A_23_P390621 | PACRGL       | Homo sapiens PARK2 co-regulated-like (PACRGL), transcript variant 1, mRNA [NM_145048]                                                                           | NM_145048    | -2.18 |
| A_23_P155900 | NPFFR2       | Homo sapiens neuropeptide FF receptor 2 (NPFFR2), transcript variant 2, mRNA [NM_053036]                                                                        | NM_053036    | -2.19 |
| A_23_P165457 | CRYBA2       | Homo sapiens crystallin, beta A2 (CRYBA2), transcript variant 1, mRNA [NM_005209]                                                                               | NM_005209    | -2.19 |
| A_23_P65307  | SLITRK6      | Homo sapiens SLIT and NTRK-like family, member 6 (SLITRK6), mRNA [NM_032229]                                                                                    | NM_032229    | -2.20 |
| A_24_P920904 | C8orf59      | Homo sapiens chromosome 8 open reading frame 59, mRNA (cDNA clone IMAGE:5212747), complete cds.                                                                 | BC032347     | -2.23 |
| A_32_P174365 | SATB2        | Homo sapiens SATB homeobox 2 (SATB2), transcript variant 2, mRNA [NM_015265]                                                                                    | NM_015265    | -2.24 |
| A_24_P697043 |              | BX091936 Soares placenta Nb2HP Homo sapiens cDNA clone IMAGP998N02193 ; IMAGE:135745, mRNA sequence [BX091936]                                                  | BX091936     | -2.24 |
| A_24_P85045  | PNPLA8       | Homo sapiens patatin-like phospholipase domain containing 8 (PNPLA8), mRNA [NM_015723]                                                                          | NM_015723    | -2.25 |
| A_24_P702020 |              | AA195394 zp87f04.s1 Stratagene HeLa cell s3 937216 Homo sapiens cDNA clone IMAGE:627199 3' similar to contains Alu repetitive element; mRNA sequence [AA195394] | AA195394     | -2.25 |
| A_32_P91906  |              | Synthetic construct Homo sapiens gateway clone IMAGE:100018321 3' read MPP1 mRNA. [CU677943]                                                                    | CU677943     | -2.26 |
| A_32_P139021 |              |                                                                                                                                                                 |              | -2.27 |
| A_24_P221660 | ZBTB41       | Homo sapiens zinc finger and BTB domain containing 41 (ZBTB41), mRNA [NM_194314]                                                                                | NM_194314    | -2.27 |
| A_24_P852099 |              |                                                                                                                                                                 |              | -2.27 |
| A_24_P462656 | TACC2        | Homo sapiens transforming, acidic coiled-coil containing protein 2, mRNA (cDNA clone IMAGE:3450479), with apparent retained intron. [BC010219]                  | BC010219     | -2.28 |

|              |              |                                                                                                                                                                                                                                                                                |              |       |
|--------------|--------------|--------------------------------------------------------------------------------------------------------------------------------------------------------------------------------------------------------------------------------------------------------------------------------|--------------|-------|
| A_24_P33446  | LOC338651    | Homo sapiens hypothetical protein LOC338651 (LOC338651), non-coding RNA [NR_021489]                                                                                                                                                                                            | NR_021489    | -2.28 |
| A_23_P83798  | ALX1         | Homo sapiens ALX homeobox 1 (ALX1), mRNA [NM_006982]                                                                                                                                                                                                                           | NM_006982    | -2.28 |
| A_24_P930100 | CENPL        | Homo sapiens cDNA FLJ31786 fis, clone NT2R12008526. [AK056348]                                                                                                                                                                                                                 | AK056348     | -2.29 |
| A_23_P371276 | RNF165       | Homo sapiens cDNA FLJ90080 fis, clone HEMBA1004797. [AK074561]                                                                                                                                                                                                                 | AK074561     | -2.31 |
| A_24_P930448 |              | t45f08.x1 Soares_NSF_F8_9W_OT_PA_P_S1 Homo sapiens cDNA clone IMAGE:2144487 3' similar to contains Alu repetitive element; contains element KER repetitive element ;, mRNA sequence [AI453629]                                                                                 | AI453629     | -2.31 |
| A_23_P409553 | PPM1A        | Homo sapiens protein phosphatase, Mg <sup>2+</sup> /Mn <sup>2+</sup> dependent, 1A (PPM1A), transcript variant 2, mRNA                                                                                                                                                         | NM_177951    | -2.33 |
| A_24_P121406 | ZC3H13       | Homo sapiens zinc finger CCCH-type containing 13 (ZC3H13), mRNA [NM_015070]                                                                                                                                                                                                    | NM_015070    | -2.34 |
| A_24_P922631 | C5orf58      | Homo sapiens chromosome 5 open reading frame 58 (C5orf58), mRNA [NM_001102609]                                                                                                                                                                                                 | NM_001102609 | -2.34 |
| A_24_P582324 |              | AA687366 nv62g05.s1 NCL_CGAP_GCB1 Homo sapiens cDNA clone IMAGE:1234424 3' similar to contains Alu repetitive element;, mRNA sequence [AA687366]                                                                                                                               | AA687366     | -2.35 |
| A_32_P41099  |              |                                                                                                                                                                                                                                                                                |              | -2.36 |
| A_24_P94351  | C1orf56      | Homo sapiens chromosome 1 open reading frame 56 (C1orf56), mRNA [NM_017860]                                                                                                                                                                                                    | NM_017860    | -2.36 |
| A_23_P356717 | ANKS1B       | Homo sapiens ankyrin repeat and sterile alpha motif domain containing 1B (ANKS1B), transcript variant 2, mRNA [NM_181670]                                                                                                                                                      | NM_181670    | -2.36 |
| A_24_P512054 | DDX50        | Homo sapiens DEAD (Asp-Glu-Ala-Asp) box polypeptide 50 (DDX50), mRNA [NM_024045]                                                                                                                                                                                               | NM_024045    | -2.37 |
| A_32_P200303 | tcag7.1307   | Homo sapiens hypothetical LOC154822 (LOC154822), non-coding RNA [NR_024394]                                                                                                                                                                                                    | NR_024394    | -2.37 |
| A_24_P927311 |              |                                                                                                                                                                                                                                                                                |              | -2.38 |
| A_23_P203702 |              | Q214U3_RHOPA (Q214U3) Penicillin-binding protein 1C precursor, partial (3%) [THC2707284]                                                                                                                                                                                       |              | -2.38 |
| A_24_P74508  | SLC25A18     | Homo sapiens solute carrier family 25 (mitochondrial carrier), member 18 (SLC25A18), nuclear gene encoding mitochondrial protein, mRNA [NM_031481]                                                                                                                             | NM_031481    | -2.39 |
| A_32_P223661 |              | as48d05.x1 Barstead aorta HPLRB6 Homo sapiens cDNA clone IMAGE:2320425 3', mRNA sequence                                                                                                                                                                                       | AI719994     | -2.40 |
| A_24_P273742 | TTC9         | Homo sapiens tetratricopeptide repeat domain 9 (TTC9), mRNA [NM_015351]                                                                                                                                                                                                        | NM_015351    | -2.40 |
| A_23_P6822   | ITIH3        | Homo sapiens inter-alpha (globulin) inhibitor H3 (ITIH3), mRNA [NM_002217]                                                                                                                                                                                                     | NM_002217    | -2.41 |
| A_23_P168610 | TSPAN13      | Homo sapiens tetraspanin 13 (TSPAN13), mRNA [NM_014399]                                                                                                                                                                                                                        | NM_014399    | -2.41 |
| A_23_P69206  | SLC6A6       | Homo sapiens solute carrier family 6 (neurotransmitter transporter, taurine), member 6 (SLC6A6), transcript variant 1, mRNA [NM_003043]                                                                                                                                        | NM_003043    | -2.42 |
| A_23_P201179 | PHTF1        | Homo sapiens mRNA for homeobox protein LSX. [AJ011863]                                                                                                                                                                                                                         | AJ011863     | -2.43 |
| A_23_P1387   | ARHGAP19     | Homo sapiens Rho GTPase activating protein 19 (ARHGAP19), mRNA [NM_032900]                                                                                                                                                                                                     | NM_032900    | -2.43 |
| A_24_P402510 | SAMD11       | Homo sapiens sterile alpha motif domain containing 11 (SAMD11), mRNA [NM_152486]                                                                                                                                                                                               | NM_152486    | -2.46 |
| A_32_P131342 |              |                                                                                                                                                                                                                                                                                |              | -2.46 |
| A_23_P136573 | ST3GAL5      | Homo sapiens ST3 beta-galactoside alpha-2,3-sialyltransferase 5 (ST3GAL5), transcript variant 1, mRNA                                                                                                                                                                          | NM_003896    | -2.48 |
| A_23_P134566 | OR2A7        | Homo sapiens olfactory receptor, family 2, subfamily A, member 7 (OR2A7), mRNA [NM_001005328]                                                                                                                                                                                  | NM_001005328 | -2.48 |
| A_23_P417014 | ZNF311       | Homo sapiens zinc finger protein 311 (ZNF311), mRNA [NM_001010877]                                                                                                                                                                                                             | NM_001010877 | -2.50 |
| A_32_P197621 | GEMIN8P4     | Homo sapiens gem (nuclear organelle) associated protein 8 pseudogene 4 (GEMIN8P4), non-coding RNA                                                                                                                                                                              | NR_002830    | -2.51 |
| A_23_P131394 | SLC16A14     | Homo sapiens solute carrier family 16, member 14 (monocarboxylic acid transporter 14) (SLC16A14), mRNA [NM_152527]                                                                                                                                                             | NM_152527    | -2.51 |
| A_32_P2807   |              | Homo sapiens cDNA clone IMAGE:4361039, partial cds. [BC064349]                                                                                                                                                                                                                 | BC064349     | -2.52 |
| A_24_P359100 | LOC100130193 | Homo sapiens cDNA FLJ38783 fis, clone LIVER2001191. [AK096102]                                                                                                                                                                                                                 | AK096102     | -2.52 |
| A_32_P23187  | LOC100127984 | PREDICTED: Homo sapiens hypothetical LOC100127984 (LOC100127984), mRNA [XM_001719916]                                                                                                                                                                                          | XM_001719916 | -2.53 |
| A_23_P131208 | NR4A2        | Homo sapiens nuclear receptor subfamily 4, group A, member 2 (NR4A2), mRNA [NM_006186]                                                                                                                                                                                         | NM_006186    | -2.54 |
| A_24_P798431 |              |                                                                                                                                                                                                                                                                                |              | -2.56 |
| A_24_P192933 | UBASH3B      | Homo sapiens ubiquitin associated and SH3 domain containing, B (UBASH3B), mRNA [NM_032873]                                                                                                                                                                                     | NM_032873    | -2.58 |
| A_23_P109934 | HEMK1        | Homo sapiens HemK methyltransferase family member 1 (HEMK1), mRNA [NM_016173]                                                                                                                                                                                                  | NM_016173    | -2.58 |
| A_24_P402438 | TGFB2        | Homo sapiens transforming growth factor, beta 2 (TGFB2), transcript variant 2, mRNA [NM_003238]                                                                                                                                                                                | NM_003238    | -2.60 |
| A_23_P160582 | HYI          | Homo sapiens hydroxypyruvate isomerase homolog (E. coli) (HYI), transcript variant 1, mRNA [NM_031207]                                                                                                                                                                         | NM_031207    | -2.62 |
| A_24_P926382 |              | Homo sapiens full length insert cDNA clone ZE05D05. [AF086528]                                                                                                                                                                                                                 | AF086528     | -2.63 |
| A_23_P104237 | GPAM         | Homo sapiens glycerol-3-phosphate acyltransferase, mitochondrial (GPAM), nuclear gene encoding mitochondrial protein, mRNA [NM_020918]                                                                                                                                         | NM_020918    | -2.65 |
| A_23_P87952  | SOX5         | Homo sapiens SRY (sex determining region Y)-box 5 (SOX5), transcript variant 2, mRNA [NM_152989]                                                                                                                                                                               | NM_152989    | -2.68 |
| A_23_P15844  | BRIP1        | Homo sapiens BRCA1 interacting protein C-terminal helicase 1 (BRIP1), mRNA [NM_032043]                                                                                                                                                                                         | NM_032043    | -2.68 |
| A_32_P75399  |              | HUMSEF21A SEF2-1A protein (Homo sapiens) (exp=1; wgp=0; cg=0), partial (5%) [THC2551774]                                                                                                                                                                                       |              | -2.68 |
| A_32_P232198 |              |                                                                                                                                                                                                                                                                                |              | -2.72 |
| A_32_P124887 |              |                                                                                                                                                                                                                                                                                |              | -2.72 |
| A_23_P258612 | ATP8A2       | Homo sapiens ATPase, aminophospholipid transporter-like, class I, type 8A, member 2 (ATP8A2), mRNA [7e14b03.x1 NCL_CGAP_Lu24 Homo sapiens cDNA clone IMAGE:3282413 3' similar to SW:NMA_HUMAN Q13145 PUTATIVE TRANSMEMBRANE PROTEIN NMA PRECURSOR. ;, mRNA sequence [BE669520] | NM_016529    | -2.74 |
| A_32_P122494 |              |                                                                                                                                                                                                                                                                                | BE669520     | -2.77 |
| A_23_P200976 | HYI          | Homo sapiens hydroxypyruvate isomerase homolog (E. coli) (HYI), transcript variant 1, mRNA [NM_031207]                                                                                                                                                                         | NM_031207    | -2.78 |
| A_32_P99347  | C9orf110     | Homo sapiens chromosome 9 open reading frame 110 (C9orf110), non-coding RNA [NR_024376]                                                                                                                                                                                        | NR_024376    | -2.79 |
| A_23_P145644 | DDC          | Homo sapiens dopa decarboxylase (aromatic L-amino acid decarboxylase) (DDC), transcript variant 2, mRNA [NM_000790]                                                                                                                                                            | NM_000790    | -2.81 |
| A_32_P229132 | FMN2         | Homo sapiens formin 2 (FMN2), mRNA [NM_020066]                                                                                                                                                                                                                                 | NM_020066    | -2.81 |
| A_23_P108492 | MARS2        | Homo sapiens methionyl-tRNA synthetase 2, mitochondrial (MARS2), nuclear gene encoding mitochondrial protein, mRNA [NM_138395]                                                                                                                                                 | NM_138395    | -2.82 |
| A_24_P944928 |              | BI047192 RC5-FT0194-050101-015-D09 FT0194 Homo sapiens cDNA, mRNA sequence [BI047192]                                                                                                                                                                                          | BI047192     | -2.83 |
| A_23_P159325 | ANGPTL4      | Homo sapiens angiopoietin-like 4 (ANGPTL4), transcript variant 1, mRNA [NM_139314]                                                                                                                                                                                             | NM_139314    | -2.85 |
| A_24_P225862 |              | yi73c12.r1 Soares placenta Nb2HP Homo sapiens cDNA clone IMAGE:144886 3', mRNA sequence [R78584]                                                                                                                                                                               | R78584       | -2.88 |
| A_23_P5654   | IL1F7        | Homo sapiens interleukin 1 family, member 7 (zeta) (IL1F7), transcript variant 1, mRNA [NM_014439]                                                                                                                                                                             | NM_014439    | -2.91 |
| A_24_P212926 | LOC728800    | Homo sapiens mRNA for FLJ00402 protein. [AK090480]                                                                                                                                                                                                                             | AK090480     | -2.91 |
| A_23_P170719 |              |                                                                                                                                                                                                                                                                                |              | -2.96 |
| A_23_P162171 | MCAM         | Homo sapiens melanoma cell adhesion molecule (MCAM), mRNA [NM_006500]                                                                                                                                                                                                          | NM_006500    | -2.97 |
| A_24_P326680 | MCAM         | Homo sapiens melanoma cell adhesion molecule (MCAM), mRNA [NM_006500]                                                                                                                                                                                                          | NM_006500    | -2.97 |
| A_23_P201181 | PTPN22       | Homo sapiens protein tyrosine phosphatase, non-receptor type 22 (lymphoid) (PTPN22), transcript variant 2, mRNA [NM_012411]                                                                                                                                                    | NM_012411    | -3.01 |
| A_32_P166031 |              | Homo sapiens cDNA clone IMAGE:6166085, partial cds. [BC052811]                                                                                                                                                                                                                 | BC052811     | -3.04 |
| A_32_P437735 | LOC256021    | Homo sapiens cDNA FLJ30877 fis, clone FEBRA2004443. [AK055439]                                                                                                                                                                                                                 | AK055439     | -3.09 |
| A_32_P119726 | DST          | Homo sapiens cDNA FLJ54409 complete cds, highly similar to Bullous pemphigoid antigen 1 isoforms 1/2/3/4/5/8. [AK295864]                                                                                                                                                       | AK295864     | -3.09 |
| A_32_P31963  |              | Q9BV9D_HUMAN (Q9BVD9) FTO protein, partial (9%) [THC2527460]                                                                                                                                                                                                                   |              | -3.09 |
| A_24_P709476 | LOC150568    | Homo sapiens hypothetical LOC150568 (LOC150568), non-coding RNA [NR_015399]                                                                                                                                                                                                    | NR_015399    | -3.10 |
| A_24_P342829 | SLC16A14     | Homo sapiens solute carrier family 16, member 14 (monocarboxylic acid transporter 14) (SLC16A14), mRNA [NM_152527]                                                                                                                                                             | NM_152527    | -3.17 |
| A_23_P5131   | ISYNA1       | Homo sapiens inositol-3-phosphate synthase 1 (ISYNA1), transcript variant 1, mRNA [NM_016368]                                                                                                                                                                                  | NM_016368    | -3.24 |
| A_23_P325690 | ANKRD35      | Homo sapiens ankyrin repeat domain 35 (ANKRD35), mRNA [NM_144698]                                                                                                                                                                                                              | NM_144698    | -3.36 |
| A_32_P185682 |              | full-length cDNA clone CS0DJ002YF02 of T cells (Jurkat cell line) Cot 10-normalized of Homo sapiens (human). [CR613361]                                                                                                                                                        | CR613361     | -3.44 |
| A_23_P48740  | DIO2         | Homo sapiens deiodinase, iodothyronine, type II (DIO2), transcript variant 1, mRNA [NM_013989]                                                                                                                                                                                 | NM_013989    | -3.52 |
| A_23_P148600 | INE1         | Homo sapiens inactivation escape 1 (non-protein coding) (INE1), non-coding RNA [NR_024616]                                                                                                                                                                                     | NR_024616    | -3.54 |
| A_23_P114414 | LONRF3       | Homo sapiens LON peptidase N-terminal domain and ring finger 3 (LONRF3), transcript variant 1, mRNA [NM_001031855]                                                                                                                                                             | NM_001031855 | -3.59 |
| A_23_P114466 | TBL1Y        | Homo sapiens transducin (beta)-like 1, Y-linked (TBL1Y), transcript variant 1, mRNA [NM_033284]                                                                                                                                                                                | NM_033284    | -3.64 |
| A_23_P137504 | ZBTB37       | Homo sapiens zinc finger and BTB domain containing 37 (ZBTB37), transcript variant 2, mRNA [NM_032522]                                                                                                                                                                         | NM_032522    | -3.66 |
| A_32_P144281 |              |                                                                                                                                                                                                                                                                                |              | -3.71 |
| A_23_P67278  | ZNF443       | Homo sapiens zinc finger protein 443 (ZNF443), mRNA [NM_005815]                                                                                                                                                                                                                | NM_005815    | -3.85 |
| A_23_P118203 | ZG16B        | Homo sapiens zymogen granule protein 16 homolog B (rat) (ZG16B), mRNA [NM_145252]                                                                                                                                                                                              | NM_145252    | -3.93 |
| A_23_P211762 | COL8A1       | collagen, type VIII, alpha 1 [Source:HGNC Symbol;Acc:2215] [ENST00000261037]                                                                                                                                                                                                   | CN371015     | -3.96 |
| A_23_P17655  | KCNJ15       | Homo sapiens potassium inwardly-rectifying channel, subfamily J, member 15 (KCNJ15), transcript variant 1, mRNA [NM_170736]                                                                                                                                                    | NM_170736    | -3.96 |
| A_23_P161458 | OLAH         | Homo sapiens oleoyl-ACP hydrolase (OLAH), transcript variant 2, mRNA [NM_001039702]                                                                                                                                                                                            | NM_001039702 | -4.01 |
| A_24_P243329 | ITGA2        | Homo sapiens integrin, alpha 2 (CD49B, alpha 2 subunit of VLA-2 receptor) (ITGA2), mRNA [NM_002203]                                                                                                                                                                            | NM_002203    | -4.13 |
| A_24_P297302 |              |                                                                                                                                                                                                                                                                                |              | -4.52 |
| A_23_P38732  | CDH2         | Homo sapiens cadherin 2, type 1, N-cadherin (neuronal) (CDH2), mRNA [NM_001792]                                                                                                                                                                                                | NM_001792    | -4.52 |
| A_24_P40626  | GREM2        | Homo sapiens gremlin 2, cysteine knot superfamily, homolog (Xenopus laevis) (GREM2), mRNA [NM_022469]                                                                                                                                                                          | NM_022469    | -4.70 |

|              |                 |                                                                                                                                                |              |        |
|--------------|-----------------|------------------------------------------------------------------------------------------------------------------------------------------------|--------------|--------|
| A_32_P934840 | <i>C8orf34</i>  | Homo sapiens chromosome 8 open reading frame 34 (C8orf34), mRNA [NM_052958]                                                                    | NM_052958    | -4.71  |
| A_23_P86653  | <i>SRGN</i>     | Homo sapiens serglycin (SRGN), mRNA [NM_002727]                                                                                                | NM_002727    | -5.25  |
| A_24_P810290 | <i>PPAPDC1A</i> | Homo sapiens phosphatidic acid phosphatase type 2 domain containing 1A (PPAPDC1A), mRNA                                                        | NM_001030059 | -5.81  |
| A_23_P69030  | <i>COL8A1</i>   | Homo sapiens collagen, type VIII, alpha 1 (COL8A1), transcript variant 1, mRNA [NM_001850]                                                     | NM_001850    | -5.81  |
| A_23_P365267 | <i>SNED1</i>    | Homo sapiens sushi, nidogen and EGF-like domains 1 (SNED1), mRNA [NM_001080437]                                                                | NM_001080437 | -6.03  |
| A_24_P185909 | <i>LONRF3</i>   | Homo sapiens LON peptidase N-terminal domain and ring finger 3 (LONRF3), transcript variant 1, mRNA [NM_001031855]                             | NM_001031855 | -6.19  |
| A_24_P139152 | <i>COL8A1</i>   | collagen, type VIII, alpha 1 [Source:HGNC Symbol;Acc:2215] [ENST00000261037]                                                                   | AL359062     | -6.35  |
| A_23_P342869 | <i>FMN2</i>     | Homo sapiens formin 2 (FMN2), mRNA [NM_020066]                                                                                                 | NM_020066    | -6.80  |
| A_32_P55241  | <i>SHISA2</i>   | Homo sapiens shisa homolog 2 (Xenopus laevis) (SHISA2), mRNA [NM_001007538]                                                                    | NM_001007538 | -6.92  |
| A_23_P76386  | <i>SLC6A12</i>  | Homo sapiens solute carrier family 6 (neurotransmitter transporter, betaine/GABA), member 12 (SLC6A12), transcript variant 1, mRNA [NM_003044] | NM_003044    | -7.51  |
| A_23_P34597  | <i>CDA</i>      | Homo sapiens cytidine deaminase (CDA), mRNA [NM_001785]                                                                                        | NM_001785    | -8.75  |
| A_24_P334130 | <i>FN1</i>      | Homo sapiens fibronectin 1 (FN1), transcript variant 7, mRNA [NM_054034]                                                                       | NM_054034    | -10.12 |
| A_23_P330611 | <i>WIPF1</i>    | Homo sapiens WAS/WASL interacting protein family, member 1 (WIPF1), transcript variant 2, mRNA                                                 | NM_001077269 | -10.24 |
| A_23_P63209  | <i>HSD11B1</i>  | Homo sapiens hydroxysteroid (11-beta) dehydrogenase 1 (HSD11B1), transcript variant 2, mRNA [NM_181755]                                        | NM_181755    | -11.93 |
