# Supplementary material for: Loss of the BRCA1-Interacting Helicase BRIP1 Results in Abnormal Mammary Acinar Morphogenesis
Source: PubMed Central journal article supplement (PMC3765252; doi:10.1371/journal.pone.0074013), 2013-09-06
Supplement: pone.0074013.s004.pdf [file pone.0074013.s004.pdf]

**Table S2. Up- and down-regulated genes ( $\geq 2$ -fold,  $P < 0.05$ ) in 3D culture of *BRIP1*-knockdown cells compared with control cells at day 8**

| ProbeName     | GeneSymbol       | Description                                                                                                                                                                        | GenbankAccession | Fold change |
|---------------|------------------|------------------------------------------------------------------------------------------------------------------------------------------------------------------------------------|------------------|-------------|
| A_23_P26854   | <i>RICH2</i>     | Homo sapiens Rho-type GTPase-activating protein RICH2 (RICH2), mRNA [NM_014859]                                                                                                    | NM_014859        | 64.54       |
| A_23_P257003  | <i>PCSK5</i>     | Homo sapiens proprotein convertase subtilisin/kexin type 5 (PCSK5), mRNA [NM_006200]                                                                                               | NM_006200        | 25.79       |
| A_23_P502413  | <i>SERPINB4</i>  | Homo sapiens serpin peptidase inhibitor, clade B (ovabumin), member 4 (SERPINB4), mRNA [NM_002974]                                                                                 | NM_002974        | 9.64        |
| A_23_P383258  | <i>GDA</i>       | Homo sapiens guanine deaminase (GDA), mRNA [NM_004293]                                                                                                                             | NM_004293        | 8.87        |
| A_23_P259741  | <i>SATB1</i>     | Homo sapiens SATB homeobox 1 (SATB1), transcript variant 1, mRNA [NM_002971]                                                                                                       | NM_002971        | 8.80        |
| A_23_P202881  | <i>FEZ1</i>      | Homo sapiens fasciculation and elongation protein zeta 1 (zyglin I) (FEZ1), transcript variant 1, mRNA                                                                             | NM_005103        | 7.62        |
| A_23_P107911  | <i>KLK10</i>     | Homo sapiens kallikrein-related peptidase 10 (KLK10), transcript variant 1, mRNA [NM_002776]                                                                                       | NM_002776        | 6.54        |
| A_23_P212869  | <i>GABRA2</i>    | Homo sapiens gamma-aminobutyric acid (GABA) A receptor, alpha 2 (GABRA2), transcript variant 1, mRNA [NM_000807]                                                                   | NM_000807        | 6.24        |
| A_23_P167121  | <i>GABRA2</i>    | Homo sapiens gamma-aminobutyric acid (GABA) A receptor, alpha 2 (GABRA2), transcript variant 1, mRNA [NM_000807]                                                                   | NM_000807        | 5.39        |
| A_23_P50638   | <i>LRG1</i>      | Homo sapiens leucine-rich alpha-2-glycoprotein 1 (LRG1), mRNA [NM_052972]                                                                                                          | NM_052972        | 5.31        |
| A_24_P25063   |                  |                                                                                                                                                                                    |                  | 4.48        |
| A_23_P17065   | <i>CCL20</i>     | Homo sapiens chemokine (C-C motif) ligand 20 (CCL20), transcript variant 1, mRNA [NM_004591]                                                                                       | NM_004591        | 4.22        |
| A_23_P110531  | <i>FST</i>       | Homo sapiens follistatin (FST), transcript variant FST344, mRNA [NM_013409]                                                                                                        | NM_013409        | 4.22        |
| A_32_P155841  |                  | Homo sapiens mRNA full length insert cDNA clone EUROIMAGE 362780. [AL079294]                                                                                                       | AL079294         | 4.14        |
| A_24_P913930  |                  | BY798802 Homo sapiens eye Homo sapiens cDNA clone HE3861.seq 5', mRNA sequence [BY798802]                                                                                          | BY798802         | 3.33        |
| A_23_P571110  | <i>C20orf54</i>  | Homo sapiens chromosome 20 open reading frame 54 (C20orf54), mRNA [NM_033409]                                                                                                      | NM_033409        | 3.29        |
| A_24_P116587  | <i>SEZ6L2</i>    | Homo sapiens seizure related 6 homolog (mouse)-like 2 (SEZ6L2), transcript variant 2, mRNA [NM_201575]                                                                             | NM_201575        | 3.15        |
| A_23_P155052  | <i>APOL6</i>     | Homo sapiens apolipoprotein L, 6 (APOL6), mRNA [NM_030641]                                                                                                                         | NM_030641        | 3.13        |
| A_24_P168398  | <i>ZNF177</i>    | Homo sapiens zinc finger protein 177 (ZNF177), transcript variant 3, mRNA [NM_003451]                                                                                              | NM_003451        | 3.10        |
| A_23_P74575   | <i>CD1D</i>      | Homo sapiens CD1d molecule (CD1D), mRNA [NM_001766]                                                                                                                                | NM_001766        | 3.06        |
| A_23_P251881  | <i>NCR3</i>      | Homo sapiens natural cytotoxicity triggering receptor 3 (NCR3), transcript variant 1, mRNA [NM_147130]                                                                             | NM_147130        | 2.99        |
| A_23_P10194   | <i>SEZ6L2</i>    | Homo sapiens seizure related 6 homolog (mouse)-like 2 (SEZ6L2), transcript variant 2, mRNA [NM_201575]                                                                             | NM_201575        | 2.98        |
| A_23_P1079817 | <i>SULT2B1</i>   | Homo sapiens sulfotransferase family, cytosolic, 2B, member 1 (SULT2B1), transcript variant 1, mRNA                                                                                | NM_004605        | 2.97        |
| A_24_P11208   | <i>CD1D</i>      | Homo sapiens CD1d molecule (CD1D), mRNA [NM_001766]                                                                                                                                | NM_001766        | 2.78        |
| A_32_P459533  | <i>FCHO1</i>     | Homo sapiens FCH domain only 1 (FCHO1), transcript variant 2, mRNA [NM_015122]                                                                                                     | NM_015122        | 2.69        |
| A_23_P201687  | <i>HES2</i>      | Homo sapiens hairy and enhancer of split 2 (Drosophila), mRNA (cDNA clone IMAGE:4634002), complete cds. [BC012091]                                                                 | BC012091         | 2.64        |
| A_23_P201939  | <i>PPM1J</i>     | Homo sapiens protein phosphatase, Mg2+/Mn2+ dependent, 1J (PPM1J), mRNA [NM_005167]                                                                                                | NM_005167        | 2.62        |
| A_23_P8913    | <i>CA2</i>       | Homo sapiens carbonic anhydrase II (CA2), mRNA [NM_000067]                                                                                                                         | NM_000067        | 2.62        |
| A_24_P221154  | <i>ABCD3</i>     | Homo sapiens ATP-binding cassette, sub-family D (ALD), member 3 (ABCD3), transcript variant 1, mRNA                                                                                | NM_002858        | 2.61        |
| A_23_P202773  | <i>C11orf20</i>  | Homo sapiens chromosome 11 open reading frame 20 (C11orf20), mRNA [NM_001039496]                                                                                                   | NM_001039496     | 2.59        |
| A_23_P211428  | <i>SMTN</i>      | Homo sapiens smoothelin (SMTN), transcript variant 2, mRNA [NM_134269]                                                                                                             | NM_134269        | 2.59        |
| A_23_P148308  | <i>RBM3</i>      | Homo sapiens RNA binding motif (RNP1, RRM) protein 3 (RBM3), mRNA [NM_006743]                                                                                                      | NM_006743        | 2.58        |
| A_23_P397910  | <i>CBLC</i>      | Homo sapiens Cas-Br-M (murine) ecotropic retroviral transforming sequence c (CBLC), transcript variant 1, mRNA [NM_012116]                                                         | NM_012116        | 2.57        |
| A_23_P400310  | <i>REG4</i>      | Homo sapiens regenerating islet-derived family, member 4 (REG4), transcript variant 2, mRNA [NM_032044]                                                                            | NM_032044        | 2.55        |
| A_24_P194881  | <i>SHANK3</i>    | Homo sapiens SH3 and multiple ankyrin repeat domains 3 (SHANK3), mRNA [NM_001080420]                                                                                               | NM_001080420     | 2.52        |
| A_23_P62768   | <i>TMEM54</i>    | Homo sapiens transmembrane protein 54 (TMEM54), mRNA [NM_033504]                                                                                                                   | NM_033504        | 2.48        |
| A_32_P155984  |                  | Q40J89_EHRCH (Q40J89) Cation efflux protein, partial (6%) [THC2733597]                                                                                                             |                  | 2.47        |
| A_24_P237686  |                  |                                                                                                                                                                                    |                  | 2.42        |
| A_24_P342312  | <i>ODZ4</i>      | Homo sapiens odz, odd Oz/ten-m homolog 4 (Drosophila) (ODZ4), mRNA [NM_001098816]                                                                                                  | NM_001098816     | 2.41        |
| A_24_P243633  | <i>DCBLD1</i>    | Homo sapiens discoidin, CUB and LCCL domain containing 1 (DCBLD1), mRNA [NM_173674]                                                                                                | NM_173674        | 2.39        |
| A_24_P188447  | <i>ELAVL4</i>    | Homo sapiens ELAV (embryonic lethal, abnormal vision, Drosophila)-like 4 (Hu antigen D) (ELAVL4), transcript variant 1, mRNA [NM_021952]                                           | NM_021952        | 2.38        |
| A_23_P43810   | <i>LTBP1</i>     | Homo sapiens latent transforming growth factor beta binding protein 1 (LTBP1), transcript variant 1, mRNA                                                                          | NM_206943        | 2.37        |
| A_23_P154818  | <i>C21orf15</i>  | Homo sapiens mRNA; cDNA DKFZp686M2227 (from clone DKFZp686M2227). [BX648100]                                                                                                       | BX648100         | 2.35        |
| A_32_P24762   |                  | he40h05.x1 NCI_CGAP_CML1 Homo sapiens cDNA clone IMAGE:2921529 3' similar to contains Alu repetitive element;contains element MER11 repetitive element ;, mRNA sequence [AW589254] | AW589254         | 2.35        |
| A_32_P207802  |                  |                                                                                                                                                                                    |                  | 2.34        |
| A_32_P162709  |                  | full-length cDNA clone CS0DC002YA18 of Neuroblastoma Cot 25-normalized of Homo sapiens (human).                                                                                    | CR624517         | 2.33        |
| A_24_P376029  | <i>NAG18</i>     | Homo sapiens NAG18 (NAG18) mRNA, complete cds. [AF210651]                                                                                                                          | AF210651         | 2.32        |
| A_23_P371276  | <i>RNF165</i>    | Homo sapiens cDNA FLJ90080 fis, clone HEMBA1004797. [AK074561]                                                                                                                     | AK074561         | 2.32        |
| A_23_P324453  | <i>ZNF254</i>    | Homo sapiens zinc finger protein 254 (ZNF254), mRNA [NM_203282]                                                                                                                    | NM_203282        | 2.30        |
| A_24_P552450  |                  |                                                                                                                                                                                    |                  | 2.27        |
| A_24_P399490  | <i>KLK10</i>     | Homo sapiens kallikrein-related peptidase 10 (KLK10), transcript variant 1, mRNA [NM_002776]                                                                                       | NM_002776        | 2.27        |
| A_23_P168828  | <i>KLF10</i>     | Homo sapiens Kruppel-like factor 10 (KLF10), transcript variant 1, mRNA [NM_005655]                                                                                                | NM_005655        | 2.26        |
| A_23_P76823   | <i>ADSSL1</i>    | Homo sapiens adenylosuccinate synthase like 1 (ADSSL1), transcript variant 1, mRNA [NM_199165]                                                                                     | NM_199165        | 2.26        |
| A_23_P71415   | <i>WDYHV1</i>    | Homo sapiens WDYHV motif containing 1 (WDYHV1), mRNA [NM_018024]                                                                                                                   | NM_018024        | 2.26        |
| A_24_P304154  | <i>AMPD3</i>     | Homo sapiens adenosine monophosphate deaminase 3 (AMPD3), transcript variant 3, mRNA                                                                                               | NM_001025390     | 2.24        |
| A_23_P170667  | <i>ASPHD1</i>    | Homo sapiens aspartate beta-hydroxylase domain containing 1 (ASPHD1), mRNA [NM_181718]                                                                                             | NM_181718        | 2.22        |
| A_23_P210811  | <i>CD93</i>      | Homo sapiens CD93 molecule (CD93), mRNA [NM_012072]                                                                                                                                | NM_012072        | 2.22        |
| A_23_P136619  | <i>CA13</i>      | Homo sapiens carbonic anhydrase XIII (CA13), mRNA [NM_198584]                                                                                                                      | NM_198584        | 2.20        |
| A_23_P69179   | <i>LEPREL1</i>   | Homo sapiens leprecan-like 1 (LEPREL1), transcript variant 1, mRNA [NM_018192]                                                                                                     | NM_018192        | 2.20        |
| A_24_P889103  | <i>SUZ12P</i>    | full-length cDNA clone CS0DC012Y18 of Neuroblastoma Cot 25-normalized of Homo sapiens (human).                                                                                     | CR597846         | 2.19        |
| A_23_P353125  | <i>FSIP1</i>     | Homo sapiens fibrous sheath interacting protein 1 (FSIP1), mRNA [NM_152597]                                                                                                        | NM_152597        | 2.19        |
| A_24_P828818  |                  |                                                                                                                                                                                    |                  | 2.18        |
| A_23_P433798  | <i>PODNL1</i>    | Homo sapiens podocan-like 1 (PODNL1), transcript variant 1, mRNA [NM_024825]                                                                                                       | NM_024825        | 2.17        |
| A_24_P829934  |                  | ALU2_HUMAN (P39189) Alu subfamily SB sequence contamination warning entry, partial (7%) [THC2683069]                                                                               |                  | 2.15        |
| A_23_P7965    | <i>PGC</i>       | Homo sapiens progastricin (pepsinogen C) (PGC), transcript variant 1, mRNA [NM_002630]                                                                                             | NM_002630        | 2.15        |
| A_23_P62999   | <i>EXTL1</i>     | Homo sapiens exostosin (multiple)-like 1 (EXTL1), mRNA [NM_004455]                                                                                                                 | NM_004455        | 2.14        |
| A_32_P2730    | <i>BCAN</i>      | Homo sapiens brevican, mRNA (cDNA clone IMAGE:3618761), with apparent retained intron. [BC005081]                                                                                  | BC005081         | 2.11        |
| A_23_P76992   | <i>PGF</i>       | Homo sapiens placental growth factor (PGF), mRNA [NM_002632]                                                                                                                       | NM_002632        | 2.10        |
| A_23_P380271  | <i>FLJ23867</i>  | Homo sapiens hypothetical protein FLJ23867 (FLJ23867), non-coding RNA [NR_026900]                                                                                                  | NR_026900        | 2.09        |
| A_24_P936963  |                  | CV390614 QV2-HT0577-160500-216-e01 HT0577 Homo sapiens cDNA, mRNA sequence [CV390614]                                                                                              | CV390614         | 2.08        |
| A_24_P922877  | <i>KLC1</i>      | Homo sapiens kinesin light chain 1 (KLC1), transcript variant 2, mRNA [NM_182923]                                                                                                  | NM_182923        | 2.08        |
| A_23_P121037  | <i>PODXL2</i>    | Homo sapiens podocalyxin-like 2 (PODXL2), mRNA [NM_015720]                                                                                                                         | NM_015720        | 2.07        |
| A_23_P208737  | <i>FOXA3</i>     | Homo sapiens forkhead box A3 (FOXA3), mRNA [NM_004497]                                                                                                                             | NM_004497        | 2.05        |
| A_24_P148762  | <i>IL1RAP</i>    | Homo sapiens interleukin 1 receptor accessory protein (IL1RAP), transcript variant 1, mRNA [NM_002182]                                                                             | NM_002182        | 2.05        |
| A_24_P910703  |                  | H.sapiens mRNA for heavy chain variable region, SM1-VH. [X87893]                                                                                                                   | X87893           | 2.04        |
| A_24_P324640  | <i>ZNF544</i>    | Homo sapiens zinc finger protein 544 (ZNF544), mRNA [NM_014480]                                                                                                                    | NM_014480        | 2.04        |
| A_23_P116286  | <i>AMPD3</i>     | Homo sapiens adenosine monophosphate deaminase 3 (AMPD3), transcript variant 3, mRNA                                                                                               | NM_001025390     | 2.04        |
| A_23_P59388   | <i>DST</i>       | Homo sapiens dystonin (DST), transcript variant 1e, mRNA [NM_001723]                                                                                                               | NM_001723        | 2.04        |
| A_24_P791040  | <i>FBXW2</i>     | Homo sapiens F-box and WD repeat domain containing 2 (FBXW2), mRNA [NM_012164]                                                                                                     | NM_012164        | 2.03        |
| A_24_P170983  | <i>ESPNL</i>     | Homo sapiens espin-like (ESPNL), mRNA [NM_194312]                                                                                                                                  | NM_194312        | 2.02        |
| A_24_P354715  | <i>NT5E</i>      | Homo sapiens 5'-nucleotidase, ecto (CD73) (NT5E), mRNA [NM_002526]                                                                                                                 | NM_002526        | 2.02        |
| A_23_P170857  | <i>IL1RAP</i>    | Homo sapiens interleukin 1 receptor accessory protein (IL1RAP), transcript variant 1, mRNA [NM_002182]                                                                             | NM_002182        | 2.02        |
| A_24_P860248  |                  | nq03d05.s1 NCI_CGAP_Lu1 Homo sapiens cDNA clone IMAGE:1142793 3' similar to contains Alu repetitive element;contains element MIR repetitive element ;, mRNA sequence [AA604529]    | AA604529         | 2.02        |
| A_32_P515920  | <i>LOC400573</i> | Homo sapiens hypothetical gene supported by BC015790; BC041634, mRNA (cDNA clone IMAGE:4865886). [BC041634]                                                                        | BC041634         | 2.01        |
| A_24_P923028  | <i>TAT</i>       | Homo sapiens tyrosine aminotransferase, mRNA (cDNA clone IMAGE:4710626), complete cds. [BC020707]                                                                                  | BC020707         | -2.00       |
| A_23_P70719   | <i>LAMA2</i>     | Homo sapiens laminin, alpha 2 (LAMA2), transcript variant 1, mRNA [NM_000426]                                                                                                      | NM_000426        | -2.01       |
| A_32_P10083   |                  | Homo sapiens mRNA; cDNA DKFZp547E184 (from clone DKFZp547E184). [AL390170]                                                                                                         | AL390170         | -2.01       |
| A_32_P37461   |                  | Homo sapiens cDNA clone IMAGE:5262677. [BC035106]                                                                                                                                  | BC035106         | -2.01       |
| A_32_P51082   |                  | AW188368 xj95g0.10.x1 Soares_NFL_T_GBC_S1 Homo sapiens cDNA clone IMAGE:2665026 3', mRNA sequence [AW188368]                                                                       | AW188368         | -2.01       |
| A_23_P57482   |                  | Em:AC005003.4 protein [Source:UniProtKB/TrEMBL;Acc:Q6ICM0] [ENST00000436050]                                                                                                       | AK000471         | -2.02       |
| A_23_P143514  | <i>C21orf122</i> | Homo sapiens chromosome 21 open reading frame 122 (C21orf122), non-coding RNA [NR_027292]                                                                                          | NR_027292        | -2.02       |

|              |                     |                                                                                                                                                      |              |       |
|--------------|---------------------|------------------------------------------------------------------------------------------------------------------------------------------------------|--------------|-------|
| A_32_P52018  | <i>PHACTR1</i>      | Homo sapiens phosphatase and actin regulator 1 (PHACTR1), mRNA [NM_030948]                                                                           | NM_030948    | -2.02 |
| A_23_P428129 | <i>CDKN1C</i>       | Homo sapiens cyclin-dependent kinase inhibitor 1C (p57, Kip2) (CDKN1C), transcript variant 1, mRNA                                                   | NM_000076    | -2.02 |
| A_23_P380298 | <i>ProSAPIP1</i>    | Homo sapiens ProSAPIP1 protein (ProSAPIP1), mRNA [NM_014731]                                                                                         | NM_014731    | -2.03 |
| A_23_P386254 | <i>NKX3-2</i>       | Homo sapiens NK3 homeobox 2 (NKX3-2), mRNA [NM_001189]                                                                                               | NM_001189    | -2.03 |
| A_32_P76255  |                     | UI-E-EJ1-ajr-d-04-0-UI.r1 UI-E-EJ1 Homo sapiens cDNA clone UI-E-EJ1-ajr-d-04-0-UI 5', mRNA sequence                                                  | BQ186660     | -2.03 |
| A_24_P937265 |                     | AW975013 EST387118 MAGE resequences, MAGN Homo sapiens cDNA, mRNA sequence [AW975013]                                                                | AW975013     | -2.04 |
| A_23_P136721 |                     | Human endogenous retrovirus H protease/integrase-derived ORF1, ORF2, and putative envelope protein mRNA, complete cds. [U88896]                      | U88896       | -2.04 |
| A_24_P910842 |                     |                                                                                                                                                      |              | -2.04 |
| A_24_P620951 | <i>LOC219731</i>    | Homo sapiens cDNA FLJ32141 fis, clone PLACE5000067. [AK056703]                                                                                       | AK056703     | -2.05 |
| A_24_P763407 |                     | Q9GKC6_THEGE (Q9GKC6) Testis-specific protein (Fragment), partial (79%) [THC2784707]                                                                 |              | -2.06 |
| A_23_P342727 | <i>STARD13</i>      | Homo sapiens StAR-related lipid transfer (START) domain containing 13 (STARD13), transcript variant alpha, mRNA [NM_178006]                          | NM_178006    | -2.06 |
| A_23_P120103 | <i>KCNS3</i>        | Homo sapiens potassium voltage-gated channel, delayed-rectifier, subfamily S, member 3 (KCNS3), mRNA [NM_002252]                                     | NM_002252    | -2.07 |
| A_23_P413051 | <i>NOXO1</i>        | Homo sapiens NADPH oxidase organizer 1 (NOXO1), transcript variant a, mRNA [NM_144603]                                                               | NM_144603    | -2.07 |
| A_32_P3131   |                     | Homo sapiens cDNA FLJ14181 fis, clone NT2RP2004300. [AK024243]                                                                                       | AK024243     | -2.07 |
| A_23_P391344 | <i>RASGEF1A</i>     | Homo sapiens RasGEF domain family, member 1A, mRNA (cDNA clone MGC:26821 IMAGE:4814750), complete cds. [BC022548]                                    | BC022548     | -2.07 |
| A_24_P306594 | <i>C1orf167</i>     | Homo sapiens mRNA: cDNA DKFZp434F1313 (from clone DKFZp434F1313). [AL834308]                                                                         | AL834308     | -2.07 |
| A_32_P62469  |                     | BQ307884 MR0-BT4501-250601-102-c01 BT4501 Homo sapiens cDNA, mRNA sequence [BQ307884]                                                                | BQ307884     | -2.08 |
| A_32_P223616 |                     | BX101252 NCL_CGAP_Lu24 Homo sapiens cDNA clone IMAGp9981115625, mRNA sequence [BX101252]                                                             | BX101252     | -2.08 |
| A_32_P56463  |                     |                                                                                                                                                      |              | -2.08 |
| A_32_P10383  |                     |                                                                                                                                                      |              | -2.09 |
| A_23_P64873  | <i>DCN</i>          | Homo sapiens decorin (DCN), transcript variant A1, mRNA [NM_001920]                                                                                  | NM_001920    | -2.09 |
| A_32_P185361 |                     | Homo sapiens mRNA full length insert cDNA clone EUROIMAGE 122871. [AL109784]                                                                         | AL109784     | -2.09 |
| A_24_P620066 |                     | AA905316 ok01a08.s1 Soares_NFL_T_GBC_S1 Homo sapiens cDNA clone IMAGE:1506518 3', mRNA sequence [AA905316]                                           | AA905316     | -2.09 |
| A_32_P4934   |                     |                                                                                                                                                      |              | -2.09 |
| A_23_P11543  | <i>FUCA1</i>        | Homo sapiens fucosidase, alpha-L- 1, tissue (FUCA1), mRNA [NM_000147]                                                                                | NM_000147    | -2.09 |
| A_23_P106280 | <i>FLJ10038</i>     | Homo sapiens hypothetical protein FLJ10038 (FLJ10038), non-coding RNA [NR_026891]                                                                    | NR_026891    | -2.10 |
| A_23_P204133 | <i>GALNT6</i>       | Homo sapiens UDP-N-acetyl-alpha-D-galactosamine:polypeptide N-acetylglucosaminyltransferase 6 (GalNAc-T6) (GALNT6), mRNA [NM_007210]                 | NM_007210    | -2.11 |
| A_32_P834726 |                     | Homo sapiens cDNA FLJ31117 fis, clone IMR322000609. [AK055679]                                                                                       | AK055679     | -2.11 |
| A_32_P31757  |                     | BX094773 NCL_CGAP_Lu5 Homo sapiens cDNA clone IMAGp998F243582, mRNA sequence [BX094773]                                                              | BX094773     | -2.11 |
| A_32_P69639  |                     |                                                                                                                                                      |              | -2.11 |
| A_23_P203053 | <i>NCAM1</i>        | Homo sapiens neural cell adhesion molecule 1 (NCAM1), transcript variant 3, mRNA [NM_001076682]                                                      | NM_001076682 | -2.12 |
| A_32_P46351  |                     |                                                                                                                                                      |              | -2.13 |
| A_24_P340112 | <i>PDK3</i>         | Homo sapiens pyruvate dehydrogenase kinase, isozyme 3 (PDK3), nuclear gene encoding mitochondrial protein, transcript variant 1, mRNA [NM_001142386] | NM_001142386 | -2.14 |
| A_23_P113056 |                     |                                                                                                                                                      |              | -2.15 |
| A_32_P119878 |                     |                                                                                                                                                      |              | -2.15 |
| A_32_P3932   |                     | Q4RS58_TETNG (Q4RS58) Chromosome 13 SCAF15000, whole genome shotgun sequence, partial (11%) [THC2692456]                                             |              | -2.15 |
| A_32_P86739  | <i>C10orf114</i>    | Homo sapiens chromosome 10 open reading frame 114 (C10orf114), mRNA [NM_001010911]                                                                   | NM_001010911 | -2.15 |
| A_32_P790284 | <i>KATNAL2</i>      | Homo sapiens katanin p60 subunit A-like 2 (KATNAL2), mRNA [NM_031303]                                                                                | NM_031303    | -2.16 |
| A_23_P28530  | <i>MFSD6</i>        | Homo sapiens major facilitator superfamily domain containing 6 (MFSD6), mRNA [NM_017694]                                                             | NM_017694    | -2.16 |
| A_32_P51119  | <i>STOX1</i>        | Homo sapiens storkhead box 1 (STOX1), transcript variant 1, mRNA [NM_152709]                                                                         | NM_152709    | -2.17 |
| A_24_P911860 | <i>DUSP19</i>       | Homo sapiens dual specificity phosphatase 19 (DUSP19), transcript variant 1, mRNA [NM_080876]                                                        | NM_080876    | -2.18 |
| A_24_P603453 |                     |                                                                                                                                                      |              | -2.19 |
| A_23_P130974 | <i>KIAA1683</i>     | Homo sapiens KIAA1683 (KIAA1683), transcript variant 2, mRNA [NM_025249]                                                                             | NM_025249    | -2.20 |
| A_23_P162171 | <i>MCAM</i>         | Homo sapiens melanoma cell adhesion molecule (MCAM), mRNA [NM_006500]                                                                                | NM_006500    | -2.20 |
| A_23_P52121  | <i>PDZK1</i>        | Homo sapiens PDZ domain containing 1 (PDZK1), mRNA [NM_002614]                                                                                       | NM_002614    | -2.20 |
| A_23_P372308 | <i>RGMA</i>         | Homo sapiens RGM domain family, member A (RGMA), transcript variant 4, mRNA [NM_020211]                                                              | NM_020211    | -2.20 |
| A_23_P144622 | <i>GNPDA1</i>       | Homo sapiens glucosamine-6-phosphate deaminase 1 (GNPDA1), mRNA [NM_005471]                                                                          | NM_005471    | -2.20 |
| A_23_P259621 | <i>LAT2</i>         | Homo sapiens linker for activation of T cells family, member 2 (LAT2), transcript variant 1, mRNA                                                    | NM_032464    | -2.21 |
| A_24_P669822 |                     |                                                                                                                                                      |              | -2.21 |
| A_24_P393051 |                     | Homo sapiens cDNA FLJ39732 fis, clone SMINT2015810. [AK097051]                                                                                       | AK097051     | -2.21 |
| A_32_P205478 |                     | AGENCOURT_8859642 NIH_MGC_71 Homo sapiens cDNA clone IMAGE:6473897 5', mRNA sequence                                                                 | BQ948285     | -2.22 |
| A_24_P102539 | <i>KRIT1</i>        | Homo sapiens KRIT1, ankyrin repeat containing (KRIT1), transcript variant 5, mRNA [NM_001013406]                                                     | NM_001013406 | -2.22 |
| A_32_P77252  |                     |                                                                                                                                                      |              | -2.23 |
| A_23_P44132  | <i>FASN</i>         | Homo sapiens fatty acid synthase (FASN), mRNA [NM_004104]                                                                                            | NM_004104    | -2.24 |
| A_23_P55828  | <i>CCL25</i>        | Homo sapiens chemokine (C-C motif) ligand 25 (CCL25), mRNA [NM_005624]                                                                               | NM_005624    | -2.24 |
| A_23_P75024  | <i>MSMB</i>         | Homo sapiens microseminoprotein, beta- (MSMB), transcript variant PSP94, mRNA [NM_002443]                                                            | NM_002443    | -2.24 |
| A_32_P171061 | <i>ASCL2</i>        | Homo sapiens achaete-scute complex homolog 2 (Drosophila) (ASCL2), mRNA [NM_005170]                                                                  | NM_005170    | -2.25 |
| A_23_P311869 | <i>ST3GAL5</i>      | Homo sapiens ST3 beta-galactoside alpha-2,3-sialyltransferase 5 (ST3GAL5), transcript variant 1, mRNA                                                | NM_003896    | -2.25 |
| A_24_P282383 | <i>MYH7</i>         | Homo sapiens myosin, heavy chain 7, cardiac muscle, beta (MYH7), mRNA [NM_000257]                                                                    | NM_000257    | -2.26 |
| A_32_P139815 |                     | BX094072 Soares fetal liver spleen 1NFLS Homo sapiens cDNA clone IMAGp998J18385, mRNA sequence                                                       | BX094072     | -2.26 |
| A_23_P145935 | <i>EPHB6</i>        | Homo sapiens EPH receptor B6 (EPHB6), mRNA [NM_004445]                                                                                               | NM_004445    | -2.27 |
| A_23_P251002 |                     |                                                                                                                                                      |              | -2.28 |
| A_32_P179615 |                     |                                                                                                                                                      |              | -2.28 |
| A_23_P126266 | <i>HLX</i>          | Homo sapiens H2.0-like homeobox (HLX), mRNA [NM_021958]                                                                                              | NM_021958    | -2.28 |
| A_32_P213948 |                     |                                                                                                                                                      |              | -2.30 |
| A_23_P6722   | <i>SPATA16</i>      | Homo sapiens spermatogenesis associated 16 (SPATA16), mRNA [NM_031955]                                                                               | NM_031955    | -2.30 |
| A_32_P176911 | <i>C14orf72</i>     | Homo sapiens chromosome 14 open reading frame 72 (C14orf72), non-coding RNA [NR_026774]                                                              | NR_026774    | -2.30 |
| A_23_P420431 | <i>XKR3</i>         | Homo sapiens XK, Kell blood group complex subunit-related family, member 3 (XKR3), mRNA [NM_175878]                                                  | NM_175878    | -2.31 |
| A_32_P11325  |                     |                                                                                                                                                      |              | -2.31 |
| A_24_P60887  | <i>ANGPT1</i>       | Homo sapiens angiotensinogen 1 (ANGPT1), mRNA [NM_0011146]                                                                                           | NM_0011146   | -2.33 |
| A_23_P135164 | <i>UAP1L1</i>       | Homo sapiens UDP-N-acetylglucosamine pyrophosphorylase 1-like 1 (UAP1L1), mRNA [NM_207309]                                                           | NM_207309    | -2.33 |
| A_23_P134237 | <i>RARRES2</i>      | Homo sapiens retinoic acid receptor responder (tazarotene induced) 2 (RARRES2), mRNA [NM_002889]                                                     | NM_002889    | -2.34 |
| A_23_P405815 | <i>PYGM</i>         | Homo sapiens phosphorylase, glycogen, muscle (PYGM), transcript variant 1, mRNA [NM_005609]                                                          | NM_005609    | -2.34 |
| A_24_P146683 | <i>MSMB</i>         | Homo sapiens microseminoprotein, beta- (MSMB), transcript variant PSP94, mRNA [NM_002443]                                                            | NM_002443    | -2.35 |
| A_23_P101374 | <i>CYP2S1</i>       | Homo sapiens cytochrome P450, family 2, subfamily S, polypeptide 1 (CYP2S1), mRNA [NM_030622]                                                        | NM_030622    | -2.36 |
| A_24_P714984 |                     | Q8N329_HUMAN (Q8N329) C3orf64 protein, partial (18%) [THC2618237]                                                                                    |              | -2.37 |
| A_32_P71032  |                     |                                                                                                                                                      |              | -2.37 |
| A_23_P66732  | <i>GSG2</i>         | Homo sapiens germ cell associated 2 (haspin) (GSG2), mRNA [NM_031965]                                                                                | NM_031965    | -2.39 |
| A_32_P101860 |                     |                                                                                                                                                      |              | -2.40 |
| A_32_P23626  |                     |                                                                                                                                                      |              | -2.41 |
| A_32_P115349 |                     |                                                                                                                                                      |              | -2.42 |
| A_24_P221007 | <i>ANKRD30B</i>     | Homo sapiens ankyrin repeat domain 30B (ANKRD30B), mRNA [NM_001145029]                                                                               | NM_001145029 | -2.45 |
| A_32_P118675 |                     | Q3AUE7_CHLCH (Q3AUE7) Glucosamine-fructose-6-phosphate aminotransferase, isomerising , partial (4%) [THC2660784]                                     |              | -2.45 |
| A_24_P920227 |                     |                                                                                                                                                      |              | -2.46 |
| A_23_P380240 | <i>CEACAM8</i>      | Homo sapiens carcinoembryonic antigen-related cell adhesion molecule 8 (CEACAM8), mRNA [NM_001816]                                                   | NM_001816    | -2.47 |
| A_24_P68908  | <i>LOC344887</i>    | Homo sapiens mRNA: cDNA DKFZp686B14224 (from clone DKFZp686B14224). [BX640843]                                                                       | BX640843     | -2.48 |
| A_32_P57486  |                     | Q3BCG3_9ARAC (Q3BCG3) Tubuliform spidroin (Fragment), partial (5%) [THC2721785]                                                                      |              | -2.48 |
| A_23_P40611  | <i>TCN2</i>         | Homo sapiens transcobalamin II; macrocytic anemia (TCN2), mRNA [NM_000355]                                                                           | NM_000355    | -2.49 |
| A_32_P179859 | <i>LOC728705</i>    | Homo sapiens cDNA FLJ31150 fis, clone IMR322001534. [AK055712]                                                                                       | AK055712     | -2.49 |
| A_23_P431569 | <i>LOC100049716</i> | Homo sapiens hypothetical protein LOC100049716, mRNA (cDNA clone IMAGE:3621928), partial cds.                                                        | BC033133     | -2.49 |
| A_23_P250951 | <i>SLC26A2</i>      | Homo sapiens solute carrier family 26 (sulfate transporter), member 2 (SLC26A2), mRNA [NM_000112]                                                    | NM_000112    | -2.51 |
| A_23_P109171 | <i>BFSP1</i>        | Homo sapiens beaded filament structural protein 1, filensin (BFSP1), transcript variant 1, mRNA [NM_001195]                                          | NM_001195    | -2.53 |
| A_32_P14582  | <i>C3P1</i>         | Homo sapiens complement component 3 precursor pseudogene (C3P1), non-coding RNA [NR_027300]                                                          | NR_027300    | -2.53 |
| A_24_P316381 |                     | Homo sapiens KIAA1267, mRNA (cDNA clone IMAGE:3948445), **** WARNING: chimeric clone ****.                                                           | BC006271     | -2.54 |

|              |                     |                                                                                                                                            |              |       |
|--------------|---------------------|--------------------------------------------------------------------------------------------------------------------------------------------|--------------|-------|
| A_23_P257043 | <i>GEM</i>          | Homo sapiens GTP binding protein overexpressed in skeletal muscle (GEM), transcript variant 1, mRNA                                        | NM_005261    | -2.55 |
| A_23_P356004 | <i>KCNIP3</i>       | Homo sapiens Kv channel interacting protein 3, calsennin (KCNIP3), transcript variant 1, mRNA [NM_013434]                                  | NM_013434    | -2.55 |
| A_23_P19529  | <i>MLN</i>          | Homo sapiens motilin (MLN), transcript variant 2, mRNA [NM_001040109]                                                                      | NM_001040109 | -2.58 |
| A_24_P758256 |                     |                                                                                                                                            |              | -2.59 |
| A_23_P156890 | <i>TCF21</i>        | Homo sapiens transcription factor 21 (TCF21), transcript variant 2, mRNA [NM_003206]                                                       | NM_003206    | -2.59 |
| A_23_P421011 | <i>KAZALD1</i>      | Homo sapiens Kazal-type serine peptidase inhibitor domain 1 (KAZALD1), mRNA [NM_030929]                                                    | NM_030929    | -2.59 |
| A_23_P51213  | <i>MYOM3</i>        | Homo sapiens myomesin family, member 3 (MYOM3), mRNA [NM_152372]                                                                           | NM_152372    | -2.61 |
| A_32_P17484  |                     | Homo sapiens mRNA; cDNA DKFZp686J0581 (from clone DKFZp686J0581). [BX647685]                                                               | BX647685     | -2.61 |
| A_23_P40108  | <i>COL9A3</i>       | Homo sapiens collagen, type IX, alpha 3 (COL9A3), mRNA [NM_001853]                                                                         | NM_001853    | -2.61 |
| A_24_P76675  | <i>MFAP3L</i>       | Homo sapiens microfibrillar-associated protein 3-like (MFAP3L), transcript variant 1, mRNA [NM_021647]                                     | NM_021647    | -2.62 |
| A_32_P182045 |                     | full-length cDNA clone CS0DF003Y118 of Fetal brain of Homo sapiens (human). [CR598370]                                                     | CR598370     | -2.63 |
| A_23_P102731 | <i>SMOX</i>         | Homo sapiens spermine oxidase (SMOX), transcript variant 1, mRNA [NM_175839]                                                               | NM_175839    | -2.64 |
| A_32_P207767 |                     | Putative uncharacterized protein ENSP00000381813 [Source:UniProtKB/TrEMBL;Acc:A8MZ04]                                                      |              | -2.65 |
| A_23_P55682  | <i>ZSCAN18</i>      | Homo sapiens zinc finger and SCAN domain containing 18 (ZSCAN18), transcript variant 3, mRNA                                               | NM_023926    | -2.66 |
| A_23_P154358 | <i>PROM2</i>        | Homo sapiens prominin 2 (PROM2), transcript variant 3, mRNA [NM_144707]                                                                    | NM_144707    | -2.67 |
| A_32_P24832  | <i>OLFML3</i>       | Homo sapiens olfactomedin-like 3 (OLFML3), mRNA [NM_020190]                                                                                | NM_020190    | -2.68 |
| A_24_P914573 | <i>SULT1A3</i>      | Homo sapiens cDNA FLJ37450 fis, clone BRAWH2010354, highly similar to Monoamine-sulfating phenol sulfotransferase (EC 2.8.2.1). [AK094769] | AK094769     | -2.68 |
| A_32_P197340 | <i>LOC285141</i>    | full-length cDNA clone CS0DI052YH08 of Placenta Cot 25-normalized of Homo sapiens (human). [CR596204]                                      | CR596204     | -2.69 |
| A_32_P15958  | <i>C21orf121</i>    | Homo sapiens chromosome 21 open reading frame 121 (C21orf121), non-coding RNA [NR_027273]                                                  | NR_027273    | -2.75 |
| A_24_P885873 | <i>LOC654433</i>    | Homo sapiens cDNA FLJ26765 fis, clone PRS02774. [AK130275]                                                                                 | AK130275     | -2.75 |
| A_23_P153540 | <i>FAM83E</i>       | Homo sapiens family with sequence similarity 83, member E (FAM83E), mRNA [NM_017708]                                                       | NM_017708    | -2.77 |
| A_32_P36905  | <i>MLNR</i>         | Homo sapiens motilin receptor (MLNR), mRNA [NM_001507]                                                                                     | NM_001507    | -2.80 |
| A_23_P365267 | <i>SNED1</i>        | Homo sapiens sushi, nidogen and EGF-like domains 1 (SNED1), mRNA [NM_001080437]                                                            | NM_001080437 | -2.80 |
| A_23_P160559 | <i>ECM1</i>         | Homo sapiens extracellular matrix protein 1 (ECM1), transcript variant 1, mRNA [NM_004425]                                                 | NM_004425    | -2.81 |
| A_23_P207221 | <i>SLC47A1</i>      | Homo sapiens solute carrier family 47, member 1 (SLC47A1), mRNA [NM_018242]                                                                | NM_018242    | -2.82 |
| A_32_P102300 |                     | Q333X5_SPAJD (Q333X5) Heparanase, partial (3%) [THC2687538]                                                                                |              | -2.82 |
| A_23_P151297 | <i>TENC1</i>        | Homo sapiens tensin like C1 domain containing phosphatase (tensin 2) (TENC1), transcript variant 1, mRNA [NM_015319]                       | NM_015319    | -2.84 |
| A_23_P137665 | <i>CHI3L1</i>       | Homo sapiens chitinase 3-like 1 (cartilage glycoprotein-39) (CHI3L1), mRNA [NM_001276]                                                     | NM_001276    | -2.84 |
| A_23_P397208 | <i>GSTM2</i>        | Homo sapiens glutathione S-transferase mu 2 (muscle) (GSTM2), transcript variant 1, mRNA [NM_000848]                                       | NM_000848    | -2.84 |
| A_23_P421401 | <i>PDGFRB</i>       | Homo sapiens platelet-derived growth factor receptor, beta polypeptide (PDGFRB), mRNA [NM_002609]                                          | NM_002609    | -2.85 |
| A_32_P735429 |                     | RNSAP seum amyloid P component (Rattus norvegicus) (exp=-1; wgp=0; cg=0), partial (30%) [THC2654992]                                       |              | -2.86 |
| A_23_P148852 |                     | Homo sapiens neuronal thread protein AD7c-NTP mRNA, complete cds. [AF010144]                                                               | AF010144     | -2.90 |
| A_24_P927976 | <i>KATNAL2</i>      | Homo sapiens mRNA; cDNA DKFZp667C165 (from clone DKFZp667C165). [AL512748]                                                                 | AL512748     | -2.90 |
| A_24_P231004 | <i>TIMELESS</i>     | Homo sapiens timeless homolog (Drosophila) (TIMELESS), mRNA [NM_003920]                                                                    | NM_003920    | -2.90 |
| A_23_P216023 | <i>ANGPT1</i>       | Homo sapiens angiotensinogen 1 (ANGPT1), mRNA [NM_001146]                                                                                  | NM_001146    | -2.91 |
| A_23_P143817 | <i>MYLK</i>         | Homo sapiens myosin light chain kinase (MYLK), transcript variant 1, mRNA [NM_053025]                                                      | NM_053025    | -2.94 |
| A_23_P411173 | <i>MPO</i>          | Homo sapiens myeloperoxidase (MPO), nuclear gene encoding mitochondrial protein, mRNA [NM_000250]                                          | NM_000250    | -2.95 |
| A_23_P344125 | <i>ISM2</i>         | Homo sapiens isthmin 2 homolog (zebrafish) (ISM2), transcript variant 1, mRNA [NM_199296]                                                  | NM_199296    | -2.95 |
| A_32_P203029 | <i>FAM9B</i>        | Homo sapiens family with sequence similarity 9, member B (FAM9B), mRNA [NM_205849]                                                         | NM_205849    | -2.96 |
| A_23_P140821 | <i>PARD6A</i>       | Homo sapiens par-6 partitioning defective 6 homolog alpha (C. elegans) (PARD6A), transcript variant 1, mRNA [NM_016948]                    | NM_016948    | -3.02 |
| A_24_P119545 | <i>ITPKB</i>        | Homo sapiens inositol 1,4,5-trisphosphate 3-kinase B, mRNA (cDNA clone MGC:23636 IMAGE:4862726), complete cds. [BC015009]                  | BC015009     | -3.10 |
| A_23_P128728 | <i>ARG2</i>         | Homo sapiens arginase, type II (ARG2), nuclear gene encoding mitochondrial protein, mRNA [NM_001172]                                       | NM_001172    | -3.15 |
| A_23_P136573 | <i>ST3GAL5</i>      | Homo sapiens ST3 beta-galactoside alpha-2,3-sialyltransferase 5 (ST3GAL5), transcript variant 1, mRNA                                      | NM_003896    | -3.24 |
| A_24_P185909 | <i>LONRF3</i>       | Homo sapiens LON peptidase N-terminal domain and ring finger 3 (LONRF3), transcript variant 1, mRNA [NM_001031855]                         | NM_001031855 | -3.25 |
| A_23_P114713 | <i>CYP4B1</i>       | Homo sapiens cytochrome P450, family 4, subfamily B, polypeptide 1 (CYP4B1), transcript variant 2, mRNA [NM_000779]                        | NM_000779    | -3.27 |
| A_24_P153547 | <i>RPS6KL1</i>      | Homo sapiens ribosomal protein S6 kinase-like 1 (RPS6KL1), mRNA [NM_031464]                                                                | NM_031464    | -3.31 |
| A_23_P134734 | <i>GOLSYN</i>       | Homo sapiens Golgi-localized protein (GOLSYN), transcript variant 9, mRNA [NM_017786]                                                      | NM_017786    | -3.41 |
| A_23_P83134  | <i>GAS1</i>         | Homo sapiens growth arrest-specific 1 (GAS1), mRNA [NM_002048]                                                                             | NM_002048    | -3.44 |
| A_32_P64716  |                     | Homo sapiens cDNA clone IMAGE:5262677. [BC035106]                                                                                          | BC035106     | -3.45 |
| A_32_P135634 |                     | Q2RZ67_SALRD (Q2RZ67) Glycosyl transferase, group 1 family protein , partial (6%) [THC2643352]                                             |              | -3.52 |
| A_23_P118203 | <i>ZG16B</i>        | Homo sapiens zymogen granule protein 16 homolog B (rat) (ZG16B), mRNA [NM_145252]                                                          | NM_145252    | -3.53 |
| A_32_P232198 |                     |                                                                                                                                            |              | -3.55 |
| A_23_P140748 | <i>NDRG4</i>        | Homo sapiens NDRG family member 4 (NDRG4), transcript variant 3, mRNA [NM_022910]                                                          | NM_022910    | -3.56 |
| A_23_P111171 | <i>B3GALT4</i>      | Homo sapiens UDP-Gal:betaGlcNAc beta 1,3-galactosyltransferase, polypeptide 4 (B3GALT4), mRNA                                              | NM_003782    | -3.57 |
| A_23_P404481 | <i>S1PR1</i>        | Homo sapiens sphingosine-1-phosphate receptor 1 (S1PR1), mRNA [NM_001400]                                                                  | NM_001400    | -3.65 |
| A_23_P94800  | <i>S100A4</i>       | Homo sapiens S100 calcium binding protein A4 (S100A4), transcript variant 1, mRNA [NM_002961]                                              | NM_002961    | -3.66 |
| A_23_P256033 | <i>EEF1A2</i>       | Homo sapiens eukaryotic translation elongation factor 1 alpha 2 (EEF1A2), mRNA [NM_001958]                                                 | NM_001958    | -3.66 |
| A_23_P17914  | <i>PNPLA3</i>       | Homo sapiens patatin-like phospholipase domain containing 3 (PNPLA3), mRNA [NM_025225]                                                     | NM_025225    | -3.72 |
| A_23_P420326 | <i>FNDC5</i>        | Homo sapiens fibronectin type III domain containing 5 (FNDC5), transcript variant 2, mRNA [NM_153756]                                      | NM_153756    | -3.74 |
| A_23_P422071 | <i>B3GALT4</i>      | Homo sapiens UDP-Gal:betaGlcNAc beta 1,3-galactosyltransferase, polypeptide 4 (B3GALT4), mRNA                                              | NM_003782    | -3.74 |
| A_23_P93122  | <i>MEP1A</i>        | Homo sapiens meprin A, alpha (PABA peptide hydrolase) (MEP1A), mRNA [NM_005588]                                                            | NM_005588    | -3.75 |
| A_23_P85008  | <i>MAOB</i>         | Homo sapiens monoamine oxidase B (MAOB), nuclear gene encoding mitochondrial protein, mRNA                                                 | NM_000898    | -3.79 |
| A_32_P207169 | <i>C1orf133</i>     | Homo sapiens chromosome 1 open reading frame 133 (C1orf133), non-coding RNA [NR_024337]                                                    | NR_024337    | -3.82 |
| A_24_P3016   |                     | 60288987F1 NIH_MGC_97 Homo sapiens cDNA clone IMAGE:4822264 5', mRNA sequence [BG719660]                                                   | BG719660     | -3.87 |
| A_23_P125505 | <i>PPEF1</i>        | Homo sapiens protein phosphatase, EF-hand calcium binding domain 1 (PPEF1), transcript variant 1, mRNA [NM_006240]                         | NM_006240    | -3.94 |
| A_32_P217643 |                     | full-length cDNA clone CS0DI068YD14 of Placenta Cot 25-normalized of Homo sapiens (human). [CR624623]                                      | CR624623     | -4.01 |
| A_23_P112289 | <i>TMOD1</i>        | Homo sapiens tropomodulin 1 (TMOD1), transcript variant 1, mRNA [NM_003275]                                                                | NM_003275    | -4.02 |
| A_32_P181297 | <i>ST70T1</i>       | Homo sapiens ST7 overlapping transcript 1 (non-protein coding) (ST70T1), antisense RNA [NR_002330]                                         | NR_002330    | -4.03 |
| A_23_P86653  | <i>SRGN</i>         | Homo sapiens serglycin (SRGN), mRNA [NM_002727]                                                                                            | NM_002727    | -4.05 |
| A_24_P321525 | <i>RERG</i>         | Homo sapiens RAS-like, estrogen-regulated, growth inhibitor (RERG), mRNA [NM_032918]                                                       | NM_032918    | -4.08 |
| A_23_P102634 | <i>WFD6C</i>        | Homo sapiens WAP four-disulfide core domain 6 (WFD6C), mRNA [NM_080827]                                                                    | NM_080827    | -4.24 |
| A_23_P56197  | <i>CRLF1</i>        | Homo sapiens cytokine receptor-like factor 1 (CRLF1), mRNA [NM_004750]                                                                     | NM_004750    | -4.24 |
| A_24_P402825 | <i>CACNA2D3</i>     | Homo sapiens calcium channel, voltage-dependent, alpha 2/delta subunit 3 (CACNA2D3), mRNA                                                  | NM_018398    | -4.34 |
| A_24_P142503 | <i>SLC47A1</i>      | Homo sapiens solute carrier family 47, member 1 (SLC47A1), mRNA [NM_018242]                                                                | NM_018242    | -4.42 |
| A_23_P83838  | <i>CA8</i>          | Homo sapiens carbonic anhydrase VIII (CA8), mRNA [NM_004056]                                                                               | NM_004056    | -4.42 |
| A_23_P421306 | <i>SYT12</i>        | Homo sapiens synaptotagmin XII (SYT12), mRNA [NM_177963]                                                                                   | NM_177963    | -4.53 |
| A_24_P171043 | <i>DKFZP547L112</i> | Homo sapiens mRNA; cDNA DKFZp547L112 (from clone DKFZp547L112). [AL512723]                                                                 | AL512723     | -4.57 |
| A_32_P185682 |                     | full-length cDNA clone CS0DJ002YF02 of T cells (Jurkat cell line) Cot 10-normalized of Homo sapiens (human). [CR613361]                    | CR613361     | -4.62 |
| A_23_P128362 | <i>MYBPC1</i>       | Homo sapiens myosin binding protein C, slow type (MYBPC1), transcript variant 2, mRNA [NM_206819]                                          | NM_206819    | -4.64 |
| A_24_P302172 | <i>PTGFR</i>        | Homo sapiens prostaglandin F receptor (FP) (PTGFR), transcript variant 2, mRNA [NM_001039585]                                              | NM_001039585 | -4.64 |
| A_24_P350546 | <i>LOC646976</i>    | Homo sapiens cDNA FLJ38763 fis, clone KIDNE2014119. [AK096082]                                                                             | AK096082     | -4.69 |
| A_23_P114466 | <i>TBL1Y</i>        | Homo sapiens transducin (beta)-like 1, Y-linked (TBL1Y), transcript variant 1, mRNA [NM_033284]                                            | NM_033284    | -4.75 |
| A_23_P121926 | <i>SEPP1</i>        | Homo sapiens selenoprotein P, plasma, 1 (SEPP1), transcript variant 1, mRNA [NM_005410]                                                    | NM_005410    | -4.77 |
| A_23_P85015  | <i>MAOB</i>         | Homo sapiens monoamine oxidase B (MAOB), nuclear gene encoding mitochondrial protein, mRNA                                                 | NM_000898    | -4.81 |
| A_23_P145644 | <i>DDC</i>          | Homo sapiens dopa decarboxylase (aromatic L-amino acid decarboxylase) (DDC), transcript variant 2, mRNA [NM_000790]                        | NM_000790    | -5.03 |
| A_23_P111583 | <i>CD36</i>         | Homo sapiens CD36 molecule (thrombospondin receptor) (CD36), transcript variant 2, mRNA                                                    | NM_001001547 | -5.06 |
| A_23_P147166 | <i>CACNA2D3</i>     | Homo sapiens mRNA for calcium channel alpha2-delta3 subunit. [AJ272268]                                                                    | AJ272268     | -5.27 |
| A_23_P253791 | <i>CAMP</i>         | Homo sapiens cathelicidin antimicrobial peptide (CAMP), mRNA [NM_004345]                                                                   | NM_004345    | -5.34 |
| A_23_P81158  | <i>ADH1C</i>        | Homo sapiens alcohol dehydrogenase 1C (class I), gamma polypeptide (ADH1C), mRNA [NM_000669]                                               | NM_000669    | -5.70 |
| A_24_P925505 | <i>CD36</i>         | CD36=collagen type I/thrombospondin receptor (one exon) [human, mRNA Partial, 369 nt]. [S67044]                                            | S67044       | -5.99 |
| A_23_P330611 | <i>WIPF1</i>        | Homo sapiens WAS/WASL interacting protein family, member 1 (WIPF1), transcript variant 2, mRNA                                             | NM_001077269 | -6.27 |
| A_23_P5131   | <i>ISYNA1</i>       | Homo sapiens inositol-3-phosphate synthase 1 (ISYNA1), transcript variant 1, mRNA [NM_016368]                                              | NM_016368    | -6.72 |
| A_23_P63209  | <i>HSD11B1</i>      | Homo sapiens hydroxysteroid (11-beta) dehydrogenase 1 (HSD11B1), transcript variant 2, mRNA                                                | NM_181755    | -6.79 |
| A_23_P148879 | <i>ATP1A2</i>       | Homo sapiens ATPase, Na+/K+ transporting, alpha 2 (+) polypeptide (ATP1A2), mRNA [NM_000702]                                               | NM_000702    | -7.08 |

|              |                |                                                                                                              |           |        |
|--------------|----------------|--------------------------------------------------------------------------------------------------------------|-----------|--------|
| A_23_P102611 | <i>WISP2</i>   | Homo sapiens WNT1 inducible signaling pathway protein 2 ( <i>WISP2</i> ), mRNA [NM_003881]                   | NM_003881 | -8.10  |
| A_23_P69030  | <i>COL8A1</i>  | Homo sapiens collagen, type VIII, alpha 1 ( <i>COL8A1</i> ), transcript variant 1, mRNA [NM_001850]          | NM_001850 | -8.59  |
| A_24_P291658 | <i>ADH1A</i>   | Homo sapiens alcohol dehydrogenase 1A (class I), alpha polypeptide ( <i>ADH1A</i> ), mRNA [NM_000667]        | NM_000667 | -8.71  |
| A_24_P418744 |                |                                                                                                              |           | -9.00  |
| A_24_P139152 | <i>COL8A1</i>  | collagen, type VIII, alpha 1 [Source:HGNC Symbol;Acc:2215] [ENST00000261037]                                 | AL359062  | -9.67  |
| A_23_P40415  | <i>ADAMTS5</i> | Homo sapiens ADAM metalloproteinase with thrombospondin type 1 motif, 5 ( <i>ADAMTS5</i> ), mRNA [NM_007038] | NM_007038 | -9.97  |
| A_23_P58359  | <i>ADH1A</i>   | Homo sapiens alcohol dehydrogenase 1A (class I), alpha polypeptide ( <i>ADH1A</i> ), mRNA [NM_000667]        | NM_000667 | -10.62 |
| A_23_P34597  | <i>CDA</i>     | Homo sapiens cytidine deaminase ( <i>CDA</i> ), mRNA [NM_001785]                                             | NM_001785 | -11.00 |
| A_23_P43164  | <i>SULF1</i>   | Homo sapiens sulfatase 1 ( <i>SULF1</i> ), transcript variant 3, mRNA [NM_015170]                            | NM_015170 | -11.64 |
