# Supplementary material for: Loss of the BRCA1-Interacting Helicase BRIP1 Results in Abnormal Mammary Acinar Morphogenesis
Source: PubMed Central journal article supplement (PMC3765252; doi:10.1371/journal.pone.0074013), 2013-09-06
Supplement: pone.0074013.s005.pdf [file pone.0074013.s005.pdf]

**Table S3. Up- and down-regulated genes ( $\geq 2$ -fold,  $P < 0.05$ ) in 3D culture of *BRIP1*-knockdown cells compared with control cells at day 12**

| ProbeName    | GeneSymbol          | Description                                                                                                                                                                                                                                                                       | GenbankAccession | Fold change |
|--------------|---------------------|-----------------------------------------------------------------------------------------------------------------------------------------------------------------------------------------------------------------------------------------------------------------------------------|------------------|-------------|
| A_23_P26854  | <i>RICH2</i>        | Homo sapiens Rho-type GTPase-activating protein RICH2 (RICH2), mRNA [NM_014859]                                                                                                                                                                                                   | NM_014859        | 44.26       |
| A_23_P257003 | <i>PCSK5</i>        | Homo sapiens proprotein convertase subtilisin/kexin type 5 (PCSK5), mRNA [NM_006200]                                                                                                                                                                                              | NM_006200        | 22.72       |
| A_23_P259741 | <i>SATB1</i>        | Homo sapiens SATB homeobox 1 (SATB1), transcript variant 1, mRNA [NM_002971]                                                                                                                                                                                                      | NM_002971        | 9.05        |
| A_23_P157926 | <i>LINGO2</i>       | Homo sapiens leucine rich repeat and Ig domain containing 2 (LINGO2), mRNA [NM_152570]                                                                                                                                                                                            | NM_152570        | 7.39        |
| A_23_P169437 | <i>LCN2</i>         | Homo sapiens lipocalin 2 (LCN2), mRNA [NM_005564]                                                                                                                                                                                                                                 | NM_005564        | 5.73        |
| A_23_P209116 | <i>CYP4F3</i>       | Homo sapiens mRNA for leukotriene B4 omega-hydroxylase, complete cds. [AB002454]                                                                                                                                                                                                  | AB002454         | 5.44        |
| A_24_P7642   | <i>FABP5</i>        | Homo sapiens fatty acid binding protein 5 (psoriasis-associated) (FABP5), mRNA [NM_001444]                                                                                                                                                                                        | NM_001444        | 5.03        |
| A_24_P11208  | <i>CD1D</i>         | Homo sapiens CD1d molecule (CD1D), mRNA [NM_001766]                                                                                                                                                                                                                               | NM_001766        | 4.88        |
| A_23_P50638  | <i>LRG1</i>         | Homo sapiens leucine-rich alpha-2-glycoprotein 1 (LRG1), mRNA [NM_052972]                                                                                                                                                                                                         | NM_052972        | 4.85        |
| A_32_P139505 | <i>RP1-21018.1</i>  | Homo sapiens kazrin (KAZ), transcript variant A, mRNA [NM_015209]                                                                                                                                                                                                                 | NM_015209        | 4.58        |
| A_32_P25065  |                     |                                                                                                                                                                                                                                                                                   |                  | 4.51        |
| A_23_P17065  | <i>CCL20</i>        | Homo sapiens chemokine (C-C motif) ligand 20 (CCL20), transcript variant 1, mRNA [NM_004591]                                                                                                                                                                                      | NM_004591        | 4.27        |
| A_24_P887857 |                     |                                                                                                                                                                                                                                                                                   |                  | 3.67        |
| A_24_P247587 | <i>LOC348751</i>    | Homo sapiens hypothetical protein LOC348751, mRNA (cDNA clone IMAGE:5311172). [BC039445]                                                                                                                                                                                          | BC039445         | 3.42        |
| A_23_P87238  | <i>SAA4</i>         | Homo sapiens serum amyloid A4, constitutive (SAA4), mRNA [NM_006512]                                                                                                                                                                                                              | NM_006512        | 3.40        |
| A_24_P384422 |                     |                                                                                                                                                                                                                                                                                   |                  | 3.26        |
| A_32_P41996  |                     | A1500335 tm95e03.x1 NCI_CGAP_Brn25 Homo sapiens cDNA clone IMAGE:2165884 3', mRNA sequence                                                                                                                                                                                        | A1500335         | 3.23        |
| A_24_P882732 |                     | Putative uncharacterized protein ENSP00000319235 [Source:UniProtKB/TrEMBL;Acc:C9JH30]                                                                                                                                                                                             | DR007925         | 3.19        |
| A_24_P57977  | <i>SRCIN1</i>       | Homo sapiens SRC kinase signaling inhibitor 1 (SRCIN1), mRNA [NM_025248]                                                                                                                                                                                                          | NM_025248        | 3.16        |
| A_32_P459533 | <i>FCHO1</i>        | Homo sapiens FCH domain only 1 (FCHO1), transcript variant 2, mRNA [NM_015122]                                                                                                                                                                                                    | NM_015122        | 3.11        |
| A_24_P161813 | <i>LOC441666</i>    | Homo sapiens zinc finger protein 91 pseudogene (LOC441666), non-coding RNA [NR_024380]                                                                                                                                                                                            | NR_024380        | 3.04        |
| A_32_P107208 | <i>C1orf106</i>     | Homo sapiens chromosome 1 open reading frame 106 (C1orf106), transcript variant 1, mRNA [NM_018265]                                                                                                                                                                               | NM_018265        | 3.01        |
| A_23_P167509 | <i>CYFIP2</i>       | Homo sapiens cytoplasmic FMR1 interacting protein 2 (CYFIP2), transcript variant 2, mRNA [NM_001037332]                                                                                                                                                                           | NM_001037332     | 2.98        |
| A_24_P324424 |                     |                                                                                                                                                                                                                                                                                   |                  | 2.95        |
| A_32_P139123 |                     | HMGA2_HUMAN (P52926) High mobility group protein HMGI-C (High mobility group AT-hook protein 2), partial (61%) [THC2560068]                                                                                                                                                       |                  | 2.89        |
| A_23_P318881 | <i>SIAE</i>         | Homo sapiens sialic acid acetyltransferase (SIAE), mRNA [NM_170601]                                                                                                                                                                                                               | NM_170601        | 2.88        |
| A_23_P205913 | <i>SLC24A1</i>      | Homo sapiens solute carrier family 24 (sodium/potassium/calcium exchanger), member 1 (SLC24A1), mRNA [NM_004727]                                                                                                                                                                  | NM_004727        | 2.78        |
| A_24_P115651 | <i>ENKUR</i>        | Homo sapiens enkurin, TRPC channel interacting protein (ENKUR), mRNA [NM_145010]                                                                                                                                                                                                  | NM_145010        | 2.77        |
| A_23_P66525  | <i>HS3ST3A1</i>     | Homo sapiens heparan sulfate (glucosamine) 3-O-sulfotransferase 3A1 (HS3ST3A1), mRNA [NM_006042]                                                                                                                                                                                  | NM_006042        | 2.75        |
| A_23_P8913   | <i>CA2</i>          | Homo sapiens carbonic anhydrase II (CA2), mRNA [NM_000067]                                                                                                                                                                                                                        | NM_000067        | 2.74        |
| A_24_P153035 |                     | Putative uncharacterized protein ENSP00000319235 [Source:UniProtKB/TrEMBL;Acc:C9JH30]                                                                                                                                                                                             | DR007925         | 2.72        |
| A_24_P384200 |                     |                                                                                                                                                                                                                                                                                   |                  | 2.67        |
| A_23_P386320 | <i>MF12</i>         | Homo sapiens antigen p97 (melanoma associated) identified by monoclonal antibodies 133.2 and 96.5 (MF12), transcript variant 2, mRNA [NM_033316]                                                                                                                                  | NM_033316        | 2.65        |
| A_24_P383802 |                     |                                                                                                                                                                                                                                                                                   |                  | 2.63        |
| A_24_P384029 | <i>LOC100130171</i> | PREDICTED: Homo sapiens similar to hematological and neurological expressed 1 (LOC100130171), miscRNA [XR_038676]                                                                                                                                                                 | XR_038676        | 2.62        |
| A_24_P278552 | <i>MPZL2</i>        | Homo sapiens myelin protein zero-like 2 (MPZL2), transcript variant 1, mRNA [NM_005797]                                                                                                                                                                                           | NM_005797        | 2.60        |
| A_23_P4335   | <i>KRT14</i>        | Homo sapiens keratin 14 (KRT14), mRNA [NM_000526]                                                                                                                                                                                                                                 | NM_000526        | 2.59        |
| A_23_P119936 | <i>REG3A</i>        | Homo sapiens regenerating islet-derived 3 alpha (REG3A), transcript variant 2, mRNA [NM_138938]                                                                                                                                                                                   | NM_138938        | 2.58        |
| A_24_P238896 |                     |                                                                                                                                                                                                                                                                                   |                  | 2.54        |
| A_24_P772103 | <i>PITPNC1</i>      | Homo sapiens cDNA FLJ37405 fis, clone BRAMY2028269. [AK094724]                                                                                                                                                                                                                    | AK094724         | 2.53        |
| A_24_P265346 | <i>KRT14</i>        | Homo sapiens keratin 14 (KRT14), mRNA [NM_000526]                                                                                                                                                                                                                                 | NM_000526        | 2.52        |
| A_24_P743806 | <i>ZNF618</i>       | Homo sapiens zinc finger protein 618 (ZNF618), mRNA [NM_133374]                                                                                                                                                                                                                   | NM_133374        | 2.50        |
| A_23_P50710  | <i>CYP4F2</i>       | Homo sapiens cytochrome P450, family 4, subfamily F, polypeptide 2 (CYP4F2), mRNA [NM_001082]                                                                                                                                                                                     | NM_001082        | 2.50        |
| A_24_P375573 |                     |                                                                                                                                                                                                                                                                                   |                  | 2.49        |
| A_24_P940680 | <i>KNDC1</i>        | Homo sapiens mRNA for FLJ00252 protein. [AK074179]                                                                                                                                                                                                                                | AK074179         | 2.46        |
| A_32_P76627  |                     | full-length cDNA clone CS0DI013YN06 of Placenta Cot 25-normalized of Homo sapiens (human). [CR597597]                                                                                                                                                                             | CR597597         | 2.46        |
| A_23_P141021 | <i>LPCAT2</i>       | Homo sapiens lysophosphatidylcholine acyltransferase 2 (LPCAT2), mRNA [NM_017839]                                                                                                                                                                                                 | NM_017839        | 2.42        |
| A_32_P213543 |                     | AA573434 nk99c02.s1 NCI_CGAP_Co3 Homo sapiens cDNA clone IMAGE:1028930 3', mRNA sequence                                                                                                                                                                                          | AA573434         | 2.42        |
| A_23_P212830 | <i>FGFR3</i>        | Homo sapiens fibroblast growth factor receptor 3 (FGFR3), transcript variant 1, mRNA [NM_000142]                                                                                                                                                                                  | NM_000142        | 2.40        |
| A_23_P28772  | <i>DBNDD2</i>       | Homo sapiens dysbindin (dystrobrevin binding protein 1) domain containing 2 (DBNDD2), transcript variant 6, mRNA [NM_001048226]                                                                                                                                                   | NM_001048226     | 2.37        |
| A_24_P366465 |                     |                                                                                                                                                                                                                                                                                   |                  | 2.36        |
| A_24_P33429  |                     |                                                                                                                                                                                                                                                                                   |                  | 2.36        |
| A_24_P401036 | <i>LOC392352</i>    | PREDICTED: Homo sapiens similar to TRIMCyp (LOC392352), mRNA [XM_002342942]                                                                                                                                                                                                       | XM_002342942     | 2.35        |
| A_24_P307384 |                     |                                                                                                                                                                                                                                                                                   |                  | 2.35        |
| A_24_P943263 | <i>RASA4</i>        | Homo sapiens RAS p21 protein activator 4 (RASA4), transcript variant 1, mRNA [NM_006989]                                                                                                                                                                                          | NM_006989        | 2.34        |
| A_23_P329870 | <i>RHBD2</i>        | Homo sapiens rhomboid 5 homolog 2 (Drosophila) (RHBD2), transcript variant 1, mRNA [NM_024599]                                                                                                                                                                                    | NM_024599        | 2.33        |
| A_23_P94819  | <i>RPH3AL</i>       | Homo sapiens raphilin 3A-like (without C2 domains) (RPH3AL), mRNA [NM_006987]                                                                                                                                                                                                     | NM_006987        | 2.33        |
| A_32_P156062 |                     |                                                                                                                                                                                                                                                                                   |                  | 2.32        |
| A_23_P86079  | <i>hCG_20426</i>    | Homo sapiens hypothetical protein LOC441869 (LOC441869), transcript variant 1, mRNA [NM_001145210]                                                                                                                                                                                | NM_001145210     | 2.31        |
| A_23_P66732  | <i>GSG2</i>         | Homo sapiens germ cell associated 2 (haspin) (GSG2), mRNA [NM_031965]                                                                                                                                                                                                             | NM_031965        | 2.31        |
| A_23_P254688 | <i>TMEM108</i>      | Homo sapiens transmembrane protein 108 (TMEM108), transcript variant 1, mRNA [NM_023943]                                                                                                                                                                                          | NM_023943        | 2.31        |
| A_32_P84242  | <i>FAM169A</i>      | Homo sapiens family with sequence similarity 169, member A (FAM169A), mRNA [NM_015566]                                                                                                                                                                                            | NM_015566        | 2.30        |
| A_24_P384059 |                     | Homo sapiens similar to Heterogeneous nuclear ribonucleoprotein A1 (Helix-destabilizing protein) (Single-strand binding protein) (hnRNP core protein A1) (HDP-1) (Topoisomerase-inhibitor suppressed), mRNA (cDNA clone IMAGE:2900557). containing frame-shift errors. IBC0102661 | BC010266         | 2.30        |
| A_23_P361679 |                     | Homo sapiens mRNA similar to hypothetical protein FLJ21463 (cDNA clone IMAGE:3504595). [BC008001]                                                                                                                                                                                 | BC008001         | 2.29        |
| A_24_P304154 | <i>AMPD3</i>        | Homo sapiens adenosine monophosphate deaminase 3 (AMPD3), transcript variant 3, mRNA                                                                                                                                                                                              | NM_001025390     | 2.29        |
| A_24_P418536 |                     |                                                                                                                                                                                                                                                                                   |                  | 2.27        |
| A_24_P144254 |                     |                                                                                                                                                                                                                                                                                   |                  | 2.26        |
| A_24_P204238 | <i>tcag7.1239</i>   | PREDICTED: Homo sapiens similar to Huntingtin interacting protein K (LOC643438), miscRNA [XR_041758]                                                                                                                                                                              | XR_041758        | 2.25        |
| A_23_P335486 | <i>C19orf51</i>     | Homo sapiens chromosome 19 open reading frame 51 (C19orf51), mRNA [NM_178837]                                                                                                                                                                                                     | NM_178837        | 2.25        |
| A_32_P226768 |                     |                                                                                                                                                                                                                                                                                   |                  | 2.25        |
| A_23_P81507  | <i>FAT2</i>         | Homo sapiens FAT tumor suppressor homolog 2 (Drosophila) (FAT2), mRNA [NM_001447]                                                                                                                                                                                                 | NM_001447        | 2.25        |
| A_24_P194881 | <i>SHANK3</i>       | Homo sapiens SH3 and multiple ankyrin repeat domains 3 (SHANK3), mRNA [NM_001080420]                                                                                                                                                                                              | NM_001080420     | 2.24        |
| A_24_P388860 | <i>OSMR</i>         | Homo sapiens oncostatin M receptor (OSMR), transcript variant 1, mRNA [NM_003999]                                                                                                                                                                                                 | NM_003999        | 2.24        |
| A_23_P250358 | <i>HERC6</i>        | Homo sapiens hect domain and RLD 6 (HERC6), transcript variant 1, mRNA [NM_017912]                                                                                                                                                                                                | NM_017912        | 2.23        |
| A_24_P560332 |                     |                                                                                                                                                                                                                                                                                   |                  | 2.23        |
| A_23_P76823  | <i>ADSSL1</i>       | Homo sapiens adenylosuccinate synthase like 1 (ADSSL1), transcript variant 1, mRNA [NM_199165]                                                                                                                                                                                    | NM_199165        | 2.22        |
| A_24_P332651 | <i>LOC650157</i>    | PREDICTED: Homo sapiens similar to TRIM5/CypA fusion protein (LOC650157), mRNA [XM_001726994]                                                                                                                                                                                     | XM_001726994     | 2.22        |
| A_23_P423074 | <i>FAM169A</i>      | Homo sapiens family with sequence similarity 169, member A (FAM169A), mRNA [NM_015566]                                                                                                                                                                                            | NM_015566        | 2.22        |
| A_23_P333022 | <i>PXT1</i>         | Homo sapiens peroxisomal, testis specific 1 (PXT1), mRNA [NM_152990]                                                                                                                                                                                                              | NM_152990        | 2.22        |
| A_23_P56703  | <i>C2orf89</i>      | Homo sapiens chromosome 2 open reading frame 89 (C2orf89), mRNA [NM_001080824]                                                                                                                                                                                                    | NM_001080824     | 2.20        |
| A_24_P152325 |                     |                                                                                                                                                                                                                                                                                   |                  | 2.19        |
| A_23_P255896 | <i>C2orf89</i>      | Homo sapiens chromosome 2 open reading frame 89 (C2orf89), mRNA [NM_001080824]                                                                                                                                                                                                    | NM_001080824     | 2.19        |
| A_24_P409521 |                     |                                                                                                                                                                                                                                                                                   |                  | 2.19        |
| A_23_P154526 | <i>GRB14</i>        | Homo sapiens growth factor receptor-bound protein 14 (GRB14), mRNA [NM_004490]                                                                                                                                                                                                    | NM_004490        | 2.18        |
| A_23_P429581 | <i>TMEM67</i>       | Homo sapiens transmembrane protein 67 (TMEM67), transcript variant 1, mRNA [NM_153704]                                                                                                                                                                                            | NM_153704        | 2.18        |
| A_24_P461497 | <i>LOC646048</i>    | PREDICTED: Homo sapiens similar to cytoskeletal beta actin (LOC646048), mRNA [XM_002343637]                                                                                                                                                                                       | XM_002343637     | 2.18        |
| A_23_P34325  | <i>LRP8</i>         | Homo sapiens low density lipoprotein receptor-related protein 8, apolipoprotein e receptor (LRP8), transcript variant 2, mRNA [NM_033300]                                                                                                                                         | NM_033300        | 2.17        |
| A_24_P934135 |                     | Sequence 1258 from Patent EP1308459. [AX747733]                                                                                                                                                                                                                                   | AX747733         | 2.17        |
| A_24_P278684 | <i>DFFB</i>         | Homo sapiens DNA fragmentation factor, 40kDa, beta polypeptide (caspase-activated DNase) (DFFB), mRNA [NM_004402]                                                                                                                                                                 | NM_004402        | 2.17        |
| A_23_P152428 | <i>MARVELD3</i>     | Homo sapiens MARVEL domain containing 3 (MARVELD3), transcript variant 2, mRNA [NM_052858]                                                                                                                                                                                        | NM_052858        | 2.17        |
| A_32_P105083 | <i>LOC348751</i>    | Homo sapiens hypothetical protein LOC348751, mRNA (cDNA clone IMAGE:5311172). [BC039445]                                                                                                                                                                                          | BC039445         | 2.16        |

|              |              |                                                                                                                                       |              |       |
|--------------|--------------|---------------------------------------------------------------------------------------------------------------------------------------|--------------|-------|
| A_24_P230388 |              |                                                                                                                                       |              | 2.16  |
| A_24_P534290 |              |                                                                                                                                       |              | 2.16  |
| A_24_P918762 |              |                                                                                                                                       |              | 2.14  |
| A_32_P224234 | LOC645195    | ALU1_HUMAN (P39188) Alu subfamily J sequence contamination warning entry, partial (7%) [THC2609092]                                   |              | 2.14  |
| A_32_P7611   |              | Homo sapiens cDNA FLJ41456 fis, clone BRSTN2012320. [AK123450]                                                                        | AK123450     | 2.14  |
| A_23_P123522 | FAM86C       | Homo sapiens family with sequence similarity 86, member C (FAM86C), transcript variant 1, mRNA                                        | NM_018172    | 2.13  |
| A_24_P308229 | AIM1L        | Homo sapiens absent in melanoma 1-like (AIM1L), mRNA [NM_001039775]                                                                   | NM_001039775 | 2.12  |
| A_24_P402784 | SLC38A3      | Homo sapiens solute carrier family 38, member 3 (SLC38A3), mRNA [NM_006841]                                                           | NM_006841    | 2.12  |
| A_23_P83098  | ALDH1A1      | Homo sapiens aldehyde dehydrogenase 1 family, member A1 (ALDH1A1), mRNA [NM_000689]                                                   | NM_000689    | 2.12  |
| A_24_P400751 |              |                                                                                                                                       |              | 2.12  |
| A_23_P43296  | FBXL6        | Homo sapiens F-box and leucine-rich repeat protein 6 (FBXL6), transcript variant 1, mRNA [NM_012162]                                  | NM_012162    | 2.11  |
| A_32_P198584 |              |                                                                                                                                       |              | 2.11  |
| A_23_P170246 | OCRL         | Homo sapiens oculocerebrorenal syndrome of Lowe (OCRL), transcript variant a, mRNA [NM_000276]                                        | NM_000276    | 2.11  |
| A_24_P316586 | DUOX1        | Homo sapiens mRNA; cDNA DKFZp434L0610 (from clone DKFZp434L0610); partial cds. [AL137592]                                             | AL137592     | 2.10  |
| A_24_P255763 |              |                                                                                                                                       |              | 2.09  |
| A_24_P375870 |              |                                                                                                                                       |              | 2.07  |
| A_24_P780353 |              |                                                                                                                                       |              | 2.07  |
| A_24_P246573 | RP1-21018.1  | Homo sapiens kazrin (KAZ), transcript variant A, mRNA [NM_015209]                                                                     | NM_015209    | 2.06  |
| A_24_P392947 |              |                                                                                                                                       |              | 2.05  |
| A_23_P116286 | AMPD3        | Homo sapiens adenosine monophosphate deaminase 3 (AMPD3), transcript variant 3, mRNA                                                  | NM_001025390 | 2.05  |
| A_23_P213359 | PCDH1        | Homo sapiens protocadherin 1 (PCDH1), transcript variant 1, mRNA [NM_002587]                                                          | NM_002587    | 2.05  |
| A_24_P315474 | LOC646973    | PREDICTED: Homo sapiens similar to eukaryotic translation elongation factor 1 beta 2 (LOC646973), miscRNA [XR_038411]                 | XR_038411    | 2.04  |
| A_23_P63660  | C10orf58     | Homo sapiens chromosome 10 open reading frame 58 (C10orf58), transcript variant 1, mRNA [NM_032333]                                   | NM_032333    | 2.04  |
| A_24_P924484 |              | Human melanoma-associated antigen p97 (melanotransferrin) mRNA, 3' flank. [K03200]                                                    | K03200       | 2.03  |
| A_32_P141948 |              | HUMKEREP keratin {Homo sapiens} (exp=-1; wgp=0; cg=0), partial (20%) [THC2564562]                                                     | AA595946     | 2.03  |
| A_24_P187355 |              |                                                                                                                                       |              | 2.03  |
| A_24_P82106  | MMP14        | Homo sapiens matrix metalloproteinase 14 (membrane-inserted) (MMP14), mRNA [NM_004995]                                                | NM_004995    | 2.02  |
| A_24_P170283 |              |                                                                                                                                       |              | 2.01  |
| A_24_P320597 | PEX3         | Homo sapiens cDNA FLJ13531 fis, clone PLACE1006288, highly similar to VOLTAGE-DEPENDENT ANION-SELECTIVE CHANNEL PROTEIN 1. [AK023593] | AK023593     | 2.01  |
| A_24_P16678  |              | Uncharacterized protein C8orf34 (Protein VEST-1) [Source:UniProtKB/Swiss-Prot;Acc:Q49A92]                                             | AK094191     | 2.01  |
| A_24_P41309  | HNRPA1P5     | full-length cDNA clone CS0DN005YM24 of Adult brain of Homo sapiens (human). [CR623706]                                                | CR623706     | 2.00  |
| A_24_P475115 |              |                                                                                                                                       |              | 2.00  |
| A_24_P143653 |              |                                                                                                                                       |              | -2.01 |
| A_23_P503127 | 3-Sep        | Homo sapiens septin 3 (SEPT3), transcript variant A, mRNA [NM_145733]                                                                 | NM_145733    | -2.01 |
| A_24_P339560 | SIGLEC11     | Homo sapiens sialic acid binding Ig-like lectin 11 (SIGLEC11), transcript variant 1, mRNA [NM_052884]                                 | NM_052884    | -2.01 |
| A_24_P102300 |              | Q333X5_SPAJD (Q333X5) Heparanase, partial (3%) [THC2687538]                                                                           |              | -2.02 |
| A_23_P979769 | BIRC7        | Homo sapiens baculoviral IAP repeat-containing 7 (BIRC7), transcript variant 2, mRNA [NM_022161]                                      | NM_022161    | -2.03 |
| A_23_P121695 | CXCL13       | Homo sapiens chemokine (C-X-C motif) ligand 13 (CXCL13), mRNA [NM_006419]                                                             | NM_006419    | -2.04 |
| A_23_P431430 |              | Putative uncharacterized protein C20orf187 [Source:UniProtKB/Swiss-Prot;Acc:Q9UGB4]                                                   | BX281604     | -2.04 |
| A_32_P37341  | LOC158863    | Homo sapiens mRNA; cDNA DKFZp586J1922 (from clone DKFZp586J1922) [AL110203]                                                           | AL110203     | -2.04 |
| A_23_P432626 | SLC25A40     | Homo sapiens solute carrier family 25, member 40 (SLC25A40), nuclear gene encoding mitochondrial protein, mRNA [NM_018843]            | NM_018843    | -2.05 |
| A_23_P369210 | CLCN5        | H.sapiens voltage-gated chloride ion channel CLCN5. [X91906]                                                                          | X91906       | -2.05 |
| A_23_P153524 | C19orf73     | Homo sapiens chromosome 19 open reading frame 73 (C19orf73), mRNA [NM_018111]                                                         | NM_018111    | -2.05 |
| A_32_P100109 | REPS2        | Homo sapiens RALBP1 associated Eps domain containing 2 (REPS2), transcript variant 1, mRNA                                            | NM_004726    | -2.06 |
| A_24_P299308 | UNQ1887      | Homo sapiens cDNA FLJ39830 fis, clone SPLEN2012846. [AK097149]                                                                        | AK097149     | -2.07 |
| A_32_P164168 |              | BM508017 ij38a01.x1 Human insulinoma Homo sapiens cDNA clone IMAGE:5633160 3', mRNA sequence                                          | BM508017     | -2.07 |
| A_24_P607645 |              |                                                                                                                                       |              | -2.07 |
| A_23_P256107 | HPSE         | Homo sapiens heparanase (HPSE), transcript variant 1, mRNA [NM_006665]                                                                | NM_006665    | -2.09 |
| A_32_P233405 |              | Sequence 1563 from Patent EP1308459. [AX748038]                                                                                       | AX748038     | -2.09 |
| A_23_P142506 | GADD45B      | Homo sapiens growth arrest and DNA-damage-inducible, beta (GADD45B), mRNA [NM_015675]                                                 | NM_015675    | -2.09 |
| A_23_P400580 | FNIP2        | Homo sapiens folliculin interacting protein 2 (FNIP2), mRNA [NM_020840]                                                               | NM_020840    | -2.09 |
| A_32_P190737 | FNIP2        | Homo sapiens cDNA FLJ25252 fis, clone STM03814. [AK057981]                                                                            | AK057981     | -2.09 |
| A_32_P89415  |              |                                                                                                                                       |              | -2.09 |
| A_32_P161262 |              |                                                                                                                                       |              | -2.10 |
| A_23_P140821 | PARD6A       | Homo sapiens par-6 partitioning defective 6 homolog alpha (C. elegans) (PARD6A), transcript variant 1, mRNA [NM_016948]               | NM_016948    | -2.10 |
| A_32_P64919  | DIAPH3       | Homo sapiens diaphanous homolog 3 (Drosophila) (DIAPH3), transcript variant 1, mRNA [NM_001042517]                                    | NM_001042517 | -2.10 |
| A_24_P102539 | KRIT1        | Homo sapiens KRIT1, ankyrin repeat containing (KRIT1), transcript variant 5, mRNA [NM_001013406]                                      | NM_001013406 | -2.10 |
| A_32_P141546 |              |                                                                                                                                       |              | -2.11 |
| A_32_P108738 | CCDC149      | Homo sapiens cDNA FLJ13410 fis, clone PLACE1001720. [AK023472]                                                                        | AK023472     | -2.11 |
| A_24_P920298 | NAIF1        | Homo sapiens nuclear apoptosis inducing factor 1, mRNA (cDNA clone MGC:32044 IMAGE:4810929), complete cds. [BC021580]                 | BC021580     | -2.11 |
| A_23_P300220 | YPEL4        | Homo sapiens yippee-like 4 (Drosophila) (YPEL4), mRNA [NM_145008]                                                                     | NM_145008    | -2.11 |
| A_23_P76633  | NALCN        | Homo sapiens sodium leak channel, non-selective (NALCN), mRNA [NM_052867]                                                             | NM_052867    | -2.11 |
| A_23_P302005 | STON1        | Homo sapiens stonin 1 (STON1), mRNA [NM_006873]                                                                                       | NM_006873    | -2.12 |
| A_23_P160751 | FCRL2        | Homo sapiens Fc receptor-like 2 (FCRL2), mRNA [NM_030764]                                                                             | NM_030764    | -2.12 |
| A_32_P42705  | LOC100144602 | Homo sapiens hypothetical, mRNA (cDNA clone IMAGE:4429392), partial cds. [BC017721]                                                   | BC017721     | -2.14 |
| A_32_P46594  | LOC145837    | Homo sapiens hypothetical LOC145837 (LOC145837), non-coding RNA [NR_026979]                                                           | NR_026979    | -2.15 |
| A_23_P161458 | OLAH         | Homo sapiens oleoyl-ACP hydrolase (OLAH), transcript variant 2, mRNA [NM_001039702]                                                   | NM_001039702 | -2.15 |
| A_32_P99347  | C9orf110     | Homo sapiens chromosome 9 open reading frame 110 (C9orf110), non-coding RNA [NR_024376]                                               | NR_024376    | -2.15 |
| A_23_P153307 | CEACAM5      | Homo sapiens carcinoembryonic antigen-related cell adhesion molecule 5 (CEACAM5), mRNA [NM_004363]                                    | NM_004363    | -2.15 |
| A_24_P300394 | GSTA2        | Homo sapiens glutathione S-transferase alpha 2 (GSTA2), mRNA [NM_000846]                                                              | NM_000846    | -2.16 |
| A_32_P78395  |              |                                                                                                                                       |              | -2.17 |
| A_23_P207221 | SLC47A1      | Homo sapiens solute carrier family 47, member 1 (SLC47A1), mRNA [NM_018242]                                                           | NM_018242    | -2.17 |
| A_24_P345866 | HPSE         | Homo sapiens, clone IMAGE:4690605, mRNA. [BC029464]                                                                                   | BC029464     | -2.17 |
| A_32_P188135 |              | ALU1_HUMAN (P39188) Alu subfamily J sequence contamination warning entry, partial (13%) [THC2515921]                                  |              | -2.17 |
| A_23_P321223 | PMCH         | Homo sapiens pro-melanin-concentrating hormone (PMCH), mRNA [NM_002674]                                                               | NM_002674    | -2.18 |
| A_32_P155826 | LOC158572    | Homo sapiens hypothetical LOC158572 (LOC158572), non-coding RNA [NR_026742]                                                           | NR_026742    | -2.19 |
| A_24_P578571 | GFRAL        | Homo sapiens GDNF family receptor alpha like (GFRAL), mRNA [NM_207410]                                                                | NM_207410    | -2.19 |
| A_23_P428129 | CDKN1C       | Homo sapiens cyclin-dependent kinase inhibitor 1C (p57, Kip2) (CDKN1C), transcript variant 1, mRNA                                    | NM_000076    | -2.20 |
| A_32_P59549  | GFRA1        | Homo sapiens GDNF family receptor alpha 1 (GFRA1), transcript variant 2, mRNA [NM_145793]                                             | NM_145793    | -2.21 |
| A_23_P14295  | C14orf162    | Homo sapiens chromosome 14 open reading frame 162 (C14orf162), non-coding RNA [NR_024630]                                             | NR_024630    | -2.21 |
| A_32_P190571 | RNF207       | Homo sapiens ring finger protein 207 (RNF207), mRNA [NM_207396]                                                                       | NM_207396    | -2.22 |
| A_23_P126363 | ADAM30       | Homo sapiens ADAM metalloproteinase domain 30 (ADAM30), mRNA [NM_021794]                                                              | NM_021794    | -2.23 |
| A_32_P46351  |              |                                                                                                                                       |              | -2.24 |
| A_32_P48279  |              | BX117479 NCI_CGAP_Lu19 Homo sapiens cDNA clone IMAGp9981075985, mRNA sequence [BX117479]                                              | BX117479     | -2.24 |
| A_23_P200512 | ZNF238       | Homo sapiens zinc finger protein 238 (ZNF238), transcript variant 2, mRNA [NM_006352]                                                 | NM_006352    | -2.24 |
| A_32_P235358 |              | Homo sapiens cDNA FLJ42179 fis, clone THYMU2030796. [AK124173]                                                                        | AK124173     | -2.25 |
| A_24_P92683  |              | immunoglobulin heavy variable 3-38 (non-functional) [Source:HGNC Symbol;Acc:5601] [ENST00000390618]                                   | AK128476     | -2.26 |
| A_32_P142586 |              | BQ323779 CM1-C10092-271000-499-f04 C10092 Homo sapiens cDNA, mRNA sequence [BQ323779]                                                 | BQ323779     | -2.26 |
| A_24_P19677  | IL28RA       | Homo sapiens interleukin 28 receptor, alpha (interferon, lambda receptor) (IL28RA), transcript variant 3, mRNA [NM_173065]            | NM_173065    | -2.26 |
| A_24_P275199 | KCNC1        | Homo sapiens potassium voltage-gated channel, Shaw-related subfamily, member 1 (KCNC1), transcript variant A, mRNA [NM_001112741]     | NM_001112741 | -2.26 |
| A_24_P179225 | MATN2        | Homo sapiens matrilin 2 (MATN2), transcript variant 2, mRNA [NM_030583]                                                               | NM_030583    | -2.27 |
| A_23_P81760  | QKI          | Homo sapiens quaking homolog, KH domain RNA binding (mouse) (QKI), transcript variant 1, mRNA                                         | NM_006775    | -2.27 |
| A_24_P938015 |              | Homo sapiens mRNA for Zinc-finger protein, partial cds. [D70834]                                                                      | D70834       | -2.28 |
| A_24_P802145 | IRS1         | Homo sapiens insulin receptor substrate 1 (IRS1), mRNA [NM_005544]                                                                    | NM_005544    | -2.28 |
| A_24_P548811 |              | Homo sapiens cDNA FLJ11396 fis, clone HEMBA1000604. [AK021458]                                                                        | AK021458     | -2.29 |
| A_23_P61466  | CD163L1      | Homo sapiens CD163 molecule-like 1 (CD163L1), mRNA [NM_174941]                                                                        | NM_174941    | -2.30 |

|               |              |                                                                                                                                                           |              |       |
|---------------|--------------|-----------------------------------------------------------------------------------------------------------------------------------------------------------|--------------|-------|
| A_32_P140220  |              |                                                                                                                                                           |              | -2.30 |
| A_23_P143334  | MACROD2      | Homo sapiens cDNA clone IMAGE:40022102. [BC128036]                                                                                                        | BC128036     | -2.30 |
| A_23_P113056  |              |                                                                                                                                                           |              | -2.30 |
| A_23_P419254  | DIAPH3       | Homo sapiens diaphanous homolog 3 (Drosophila) (DIAPH3), transcript variant 2, mRNA [NM_030932]                                                           | NM_030932    | -2.31 |
| A_24_P201360  | ACSL5        | Homo sapiens acyl-CoA synthetase long-chain family member 5 (ACSL5), transcript variant 3, mRNA                                                           | NM_203380    | -2.32 |
| A_24_P362805  | GK5          | Homo sapiens glycerol kinase 5 (putative) (GK5), transcript variant 2, non-coding RNA [NR_033289]                                                         | NR_033289    | -2.33 |
| A_24_P239606  | GADD45B      | Homo sapiens growth arrest and DNA-damage-inducible, beta (GADD45B), mRNA [NM_015675]                                                                     | NM_015675    | -2.33 |
| A_23_P207003  | 4-Sep        | Homo sapiens septin 4 (SEPT4), transcript variant 1, mRNA [NM_004574]                                                                                     | NM_004574    | -2.34 |
| A_23_P156087  | GHR          | Homo sapiens growth hormone receptor (GHR), mRNA [NM_000163]                                                                                              | NM_000163    | -2.36 |
| A_24_P760960  | SKINTL       | Homo sapiens Skint-like (pseudogene) (SKINTL), non-coding RNA [NR_026749]                                                                                 | NR_026749    | -2.37 |
| A_23_P202219  | CALHM2       | Homo sapiens calcium homeostasis modulator 2 (CALHM2), transcript variant 1, mRNA [NM_015916]                                                             | NM_015916    | -2.38 |
| A_23_P74778   | C1orf54      | Homo sapiens chromosome 1 open reading frame 54 (C1orf54), mRNA [NM_024579]                                                                               | NM_024579    | -2.38 |
| A_23_P102731  | SMOX         | Homo sapiens spermine oxidase (SMOX), transcript variant 1, mRNA [NM_175839]                                                                              | NM_175839    | -2.39 |
| A_24_P321525  | RERG         | Homo sapiens RAS-like, estrogen-regulated, growth inhibitor (RERG), mRNA [NM_032918]                                                                      | NM_032918    | -2.40 |
| A_24_P342829  | SLC16A14     | Homo sapiens solute carrier family 16, member 14 (monocarboxylic acid transporter 14) (SLC16A14), mRNA [NM_152527]                                        | NM_152527    | -2.41 |
| A_23_P356004  | KCNIP3       | Homo sapiens Kv channel interacting protein 3, calsenuin (KCNIP3), transcript variant 1, mRNA [NM_013434]                                                 | NM_013434    | -2.41 |
| A_23_P19482   | DDAH2        | Homo sapiens dimethylarginine dimethylaminohydrolase 2 (DDAH2), mRNA [NM_013974]                                                                          | NM_013974    | -2.41 |
| A_24_P60403   | MGC2848      | Homo sapiens hypothetical protein MGC2848, mRNA (cDNA clone IMAGE:2967248), partial cds. [BC007984]                                                       | BC007984     | -2.42 |
| A_23_P135164  | UAP1L1       | Homo sapiens UDP-N-actetylglucosamine pyrophosphorylase 1-like 1 (UAP1L1), mRNA [NM_207309]                                                               | NM_207309    | -2.44 |
| A_23_P354609  |              | Homo sapiens cDNA FLJ38264 fis, clone FCBBF3001657. [AK095583]                                                                                            | AK095583     | -2.44 |
| A_23_P251387  | REPS2        | Homo sapiens RALBP1 associated Eps domain containing 2 (REPS2), transcript variant 1, mRNA                                                                | NM_004726    | -2.45 |
| A_23_P417974  | AQP11        | Homo sapiens aquaporin 11 (AQP11), mRNA [NM_173039]                                                                                                       | NM_173039    | -2.46 |
| A_24_P579356  | ARHGAP28     | Homo sapiens Rho GTPase activating protein 28 (ARHGAP28), transcript variant 1, mRNA [NM_001010000]                                                       | NM_001010000 | -2.46 |
| A_32_P65589   |              | Homo sapiens partial mRNA for immunoglobulin anti-gp96/grp94 variable region of heavy chain (DP-3 derivative gene), clone H11B. [AJ252276]                | AJ252276     | -2.46 |
| A_23_P348876  |              | Homo sapiens cDNA FLJ12616 fis, clone NT2RM4001650. [AK022678]                                                                                            | AK022678     | -2.49 |
| A_23_P151710  | PTGER2       | Homo sapiens prostaglandin E receptor 2 (subtype EP2), 53kDa (PTGER2), mRNA [NM_000956]                                                                   | NM_000956    | -2.49 |
| A_23_P380298  | ProSAPIP1    | Homo sapiens ProSAPIP1 protein (ProSAPIP1), mRNA [NM_014731]                                                                                              | NM_014731    | -2.51 |
| A_32_P64004   |              | NM_067624 Y55F3AM.3a (Caenorhabditis elegans) (exp=-1; wqp=0; cq=0), partial (4%) [THC2539939]                                                            |              | -2.53 |
| A_24_P109887  |              | LOC554207 protein [Source:UniProtKB/TrEMBL;Acc:Q8N1B8][ENST00000320322]                                                                                   | BC031469     | -2.55 |
| A_23_P429977  | KCNQ1        | Homo sapiens potassium voltage-gated channel, KQT-like subfamily, member 1 (KCNQ1), transcript variant 1, mRNA [NM_000218]                                | NM_000218    | -2.56 |
| A_24_P592570  |              | Q5CVE8_CRYPV (Q5CVE8) Fibrillarlin. RNA methylase, partial (6%) [THC2507877]                                                                              |              | -2.58 |
| A_24_P185689  | ACSS1        | Homo sapiens acyl-CoA synthetase short-chain family member 1 (ACSS1), nuclear gene encoding mitochondrial protein, mRNA [NM_032501]                       | NM_032501    | -2.62 |
| A_32_P148146  |              | BF955364 RC5-NN0245-171100-021-G10 NN0245 Homo sapiens cDNA, mRNA sequence [BF955364]                                                                     | BF955364     | -2.66 |
| A_24_P185117  | RILP         | Homo sapiens Rab interacting lysosomal protein (RILP), mRNA [NM_031430]                                                                                   | NM_031430    | -2.67 |
| A_24_P315256  |              |                                                                                                                                                           |              | -2.68 |
| A_23_P53176   | FOLR1        | Homo sapiens folate receptor 1 (adult) (FOLR1), transcript variant 1, mRNA [NM_016725]                                                                    | NM_016725    | -2.70 |
| A_23_P6099    | PLCB1        | Homo sapiens phospholipase C, beta 1 (phosphoinositide-specific) (PLCB1), transcript variant 1, mRNA                                                      | NM_015192    | -2.72 |
| A_23_P26815   | RILP         | Homo sapiens Rab interacting lysosomal protein (RILP), mRNA [NM_031430]                                                                                   | NM_031430    | -2.73 |
| A_32_P83811   | FAM47E       | Homo sapiens family with sequence similarity 47, member E (FAM47E), mRNA [NM_001136570]                                                                   | NM_001136570 | -2.74 |
| A_23_P397320  | JSRP1        | Homo sapiens junctional sarcoplasmic reticulum protein 1 (JSRP1), mRNA [NM_144616]                                                                        | NM_144616    | -2.75 |
| A_23_P85008   | MAOB         | Homo sapiens monoamine oxidase B (MAOB), nuclear gene encoding mitochondrial protein, mRNA                                                                | NM_000898    | -2.81 |
| A_24_P323941  | C20orf106    | Homo sapiens chromosome 20 open reading frame 106 (C20orf106), mRNA [NM_001012971]                                                                        | NM_001012971 | -2.87 |
| A_32_P58029   |              |                                                                                                                                                           |              | -2.88 |
| A_23_P258582  | GK5          | Homo sapiens glycerol kinase 5 (putative) (GK5), transcript variant 1, mRNA [NM_001039547]                                                                | NM_001039547 | -2.89 |
| A_23_P37785   | KCTD19       | Homo sapiens cDNA FLJ52078 complete cds, highly similar to Mus musculus potassium channel tetramerisation domain containing 19 (Kctd19), mRNA. [AK302567] | AK302567     | -2.91 |
| A_23_P48988   | SH3GL3       | Homo sapiens SH3-domain GRB2-like 3 (SH3GL3), transcript variant 1, mRNA [NM_003027]                                                                      | NM_003027    | -2.92 |
| A_23_P148015  | AXIN2        | Homo sapiens axin 2 (AXIN2), mRNA [NM_004655]                                                                                                             | NM_004655    | -2.92 |
| A_23_P304373  | HTR5A        | Homo sapiens 5-hydroxytryptamine (serotonin) receptor 5A (HTR5A), mRNA [NM_024012]                                                                        | NM_024012    | -2.92 |
| A_23_P113748  | ZNF385D      | Homo sapiens zinc finger protein 385D (ZNF385D), mRNA [NM_024697]                                                                                         | NM_024697    | -2.94 |
| A_32_P17484   |              | Homo sapiens mRNA; cDNA DKFZp686J0581 (from clone DKFZp686J0581). [BX647685]                                                                              | BX647685     | -3.02 |
| A_23_P200976  | HYI          | Homo sapiens hydroxypyruvate isomerase homolog (E. coli) (HYI), transcript variant 1, mRNA [NM_031207]                                                    | NM_031207    | -3.03 |
| A_32_P25419   |              | Synthetic construct Homo sapiens gateway clone IMAGE:100021719 3' read SEPP1 mRNA. [CU691335]                                                             | CU691335     | -3.05 |
| A_24_P319923  | MYLK         | Homo sapiens myosin light chain kinase (MYLK), transcript variant 1, mRNA [NM_053025]                                                                     | NM_053025    | -3.06 |
| A_24_P558135  |              | tx28f05.x1 NCL_CGAP_Lu24 Homo sapiens cDNA clone IMAGE:2270913 3', mRNA sequence [AI801879]                                                               | AI801879     | -3.07 |
| A_23_P160582  | HYI          | Homo sapiens hydroxypyruvate isomerase homolog (E. coli) (HYI), transcript variant 1, mRNA [NM_031207]                                                    | NM_031207    | -3.08 |
| A_23_P338134  | KIAA1920     | Homo sapiens mRNA for KIAA1920 protein, partial cds. [AB067507]                                                                                           | AB067507     | -3.10 |
| A_32_P117232  |              | AW450111 UI-H-BI3-akw-e-08-0-UI.s1 NCL_CGAP_Sub5 Homo sapiens cDNA clone IMAGE:2735726 3', mRNA sequence [AW450111]                                       | AW450111     | -3.11 |
| A_23_P128503  | IL26         | Homo sapiens interleukin 26 (IL26), mRNA [NM_018402]                                                                                                      | NM_018402    | -3.12 |
| A_24_P364591  | FBLN5        | Homo sapiens fibulin 5 (FBLN5), mRNA [NM_006329]                                                                                                          | NM_006329    | -3.22 |
| A_32_P181297  | ST7OT1       | Homo sapiens ST7 overlapping transcript 1 (non-protein coding) (ST7OT1), antisense RNA [NR_002330]                                                        | NR_002330    | -3.24 |
| A_23_P210425  | MYL9         | Homo sapiens myosin, light chain 9, regulatory (MYL9), transcript variant 2, mRNA [NM_181526]                                                             | NM_181526    | -3.26 |
| A_23_P5131    | ISYNA1       | Homo sapiens inositol-3-phosphate synthase 1 (ISYNA1), transcript variant 1, mRNA [NM_016368]                                                             | NM_016368    | -3.27 |
| A_24_P418744  |              |                                                                                                                                                           |              | -3.27 |
| A_24_P71904   | HPGD         | Homo sapiens hydroxyprostaglandin dehydrogenase 15-(NAD) (HPGD), transcript variant 1, mRNA                                                               | NM_000860    | -3.28 |
| A_32_P7176    |              | AW949170 QV4-FT0006-110500-206-c01 FT0006 Homo sapiens cDNA, mRNA sequence [AW949170]                                                                     | AW949170     | -3.28 |
| A_23_P2104522 | NEBL         | Homo sapiens nebulin (NEBL), transcript variant 1, mRNA [NM_006393]                                                                                       | NM_006393    | -3.31 |
| A_32_P207169  | C1orf133     | Homo sapiens chromosome 1 open reading frame 133 (C1orf133), non-coding RNA [NR_024337]                                                                   | NR_024337    | -3.32 |
| A_23_P145935  | EPHB6        | Homo sapiens EPH receptor B6 (EPHB6), mRNA [NM_004445]                                                                                                    | NM_004445    | -3.35 |
| A_23_P128728  | ARG2         | Homo sapiens arginase, type II (ARG2), nuclear gene encoding mitochondrial protein, mRNA [NM_001172]                                                      | NM_001172    | -3.36 |
| A_32_P118675  |              | Q3AUE7_CHLCH (Q3AUE7) Glucosamine-fructose-6-phosphate aminotransferase, isomerising , partial (4%) [THC2660784]                                          |              | -3.36 |
| A_23_P93141   | GSTA5        | Homo sapiens glutathione S-transferase alpha 5 (GSTA5), mRNA [NM_153699]                                                                                  | NM_153699    | -3.45 |
| A_32_P183718  | SP5          | Homo sapiens Sp5 transcription factor (SP5), mRNA [NM_001003845]                                                                                          | NM_001003845 | -3.51 |
| A_23_P143817  | MYLK         | Homo sapiens myosin light chain kinase (MYLK), transcript variant 1, mRNA [NM_053025]                                                                     | NM_053025    | -3.62 |
| A_23_P131394  | SLC16A14     | Homo sapiens solute carrier family 16, member 14 (monocarboxylic acid transporter 14) (SLC16A14), mRNA [NM_152527]                                        | NM_152527    | -3.64 |
| A_24_P104407  | SYNM         | Homo sapiens synemin, intermediate filament protein (SYNM), transcript variant A, mRNA [NM_145728]                                                        | NM_145728    | -3.66 |
| A_23_P213050  | HPGD         | Homo sapiens hydroxyprostaglandin dehydrogenase 15-(NAD) (HPGD), transcript variant 1, mRNA                                                               | NM_000860    | -3.72 |
| A_23_P128235  | KRT1         | Homo sapiens keratin 1 (KRT1), mRNA [NM_006121]                                                                                                           | NM_006121    | -3.75 |
| A_23_P118203  | ZG16B        | Homo sapiens zymogen granule protein 16 homolog B (rat) (ZG16B), mRNA [NM_145252]                                                                         | NM_145252    | -3.78 |
| A_24_P925505  | CD36         | CD36-collagen type I/thrombospondin receptor (one exon) [human, mRNA Partial, 369 nt]. [S67044]                                                           | S67044       | -3.82 |
| A_23_P140748  | NDRG4        | Homo sapiens NDRG family member 4 (NDRG4), transcript variant 3, mRNA [NM_022910]                                                                         | NM_022910    | -3.85 |
| A_23_P83134   | GAS1         | Homo sapiens growth arrest-specific 1 (GAS1), mRNA [NM_002048]                                                                                            | NM_002048    | -3.88 |
| A_23_P120594  | ACSS1        | Homo sapiens acyl-CoA synthetase short-chain family member 1 (ACSS1), nuclear gene encoding mitochondrial protein, mRNA [NM_032501]                       | NM_032501    | -3.90 |
| A_23_P212258  | KNG1         | Homo sapiens kininogen 1 (KNG1), transcript variant 2, mRNA [NM_000893]                                                                                   | NM_000893    | -3.91 |
| A_23_P111583  | CD36         | Homo sapiens CD36 molecule (thrombospondin receptor) (CD36), transcript variant 2, mRNA                                                                   | NM_001001547 | -3.93 |
| A_32_P218734  | COL5A2       | Homo sapiens collagen, type V, alpha 2 (COL5A2), mRNA [NM_000393]                                                                                         | NM_000393    | -4.00 |
| A_32_P146309  | CACNB2       | Homo sapiens cDNA FLJ45229 fis, clone BRCAN2020972. [AK128769]                                                                                            | AK128769     | -4.01 |
| A_23_P69030   | COL8A1       | Homo sapiens collagen, type VIII, alpha 1 (COL8A1), transcript variant 1, mRNA [NM_001850]                                                                | NM_001850    | -4.09 |
| A_24_P171043  | DKFZP547L112 | Homo sapiens mRNA; cDNA DKFZp547L112 (from clone DKFZp547L112). [AL512723]                                                                                | AL512723     | -4.17 |
| A_23_P125505  | PPEF1        | Homo sapiens protein phosphatase, EF-hand calcium binding domain 1 (PPEF1), transcript variant 1, mRNA [NM_006240]                                        | NM_006240    | -4.17 |
| A_23_P128362  | MYBPC1       | Homo sapiens myosin binding protein C, slow type (MYBPC1), transcript variant 2, mRNA [NM_206819]                                                         | NM_206819    | -4.18 |
| A_23_P36901   | CPB2         | Homo sapiens carboxypeptidase B2 (plasma) (CPB2), transcript variant 1, mRNA [NM_001872]                                                                  | NM_001872    | -4.30 |
| A_24_P402825  | CACNA2D3     | Homo sapiens calcium channel, voltage-dependent, alpha 2/delta subunit 3 (CACNA2D3), mRNA                                                                 | NM_018398    | -4.36 |
| A_23_P46879   | PNLIP        | Homo sapiens pancreatic lipase (PNLIP), mRNA [NM_000936]                                                                                                  | NM_000936    | -4.51 |

|              |                 |                                                                                                                   |              |        |
|--------------|-----------------|-------------------------------------------------------------------------------------------------------------------|--------------|--------|
| A_23_P169978 | <i>ZNF608</i>   | Homo sapiens zinc finger protein 608 (ZNF608), mRNA [NM_020747]                                                   | NM_020747    | -4.51  |
| A_23_P135381 | <i>SP5</i>      | Homo sapiens Sp5 transcription factor (SP5), mRNA [NM_001003845]                                                  | NM_001003845 | -4.52  |
| A_23_P147166 | <i>CACNA2D3</i> | Homo sapiens mRNA for calcium channel alpha2-delta3 subunit. [AJ272268]                                           | AJ272268     | -4.67  |
| A_32_P197561 | <i>EBF1</i>     | Homo sapiens early B-cell factor 1 (EBF1), mRNA [NM_024007]                                                       | NM_024007    | -4.67  |
| A_23_P422071 | <i>B3GALT4</i>  | Homo sapiens UDP-Gal:betaGlcNAc beta 1,3-galactosyltransferase, polypeptide 4 (B3GALT4), mRNA                     | NM_003782    | -4.71  |
| A_32_P71032  |                 |                                                                                                                   |              | -4.71  |
| A_23_P24129  | <i>DKK1</i>     | Homo sapiens dickkopf homolog 1 (Xenopus laevis) (DKK1), mRNA [NM_012242]                                         | NM_012242    | -4.77  |
| A_23_P111171 | <i>B3GALT4</i>  | Homo sapiens UDP-Gal:betaGlcNAc beta 1,3-galactosyltransferase, polypeptide 4 (B3GALT4), mRNA                     | NM_003782    | -4.86  |
| A_32_P36905  |                 |                                                                                                                   |              | -4.93  |
| A_23_P104493 | <i>PAPSS2</i>   | Homo sapiens 3'-phosphoadenosine 5'-phosphosulfate synthase 2 (PAPSS2), transcript variant 2, mRNA [NM_001015880] | NM_001015880 | -5.00  |
| A_23_P162171 | <i>MCAM</i>     | Homo sapiens melanoma cell adhesion molecule (MCAM), mRNA [NM_006500]                                             | NM_006500    | -5.00  |
| A_24_P10137  | <i>C13orf15</i> | Homo sapiens chromosome 13 open reading frame 15 (C13orf15), mRNA [NM_014059]                                     | NM_014059    | -5.25  |
| A_23_P204937 | <i>C13orf15</i> | Homo sapiens chromosome 13 open reading frame 15 (C13orf15), mRNA [NM_014059]                                     | NM_014059    | -5.25  |
| A_23_P156880 | <i>ENPP1</i>    | Homo sapiens ectonucleotide pyrophosphatase/phosphodiesterase 1 (ENPP1), mRNA [NM_006208]                         | NM_006208    | -5.27  |
| A_23_P349566 | <i>CCDC85A</i>  | Homo sapiens coiled-coil domain containing 85A (CCDC85A), mRNA [NM_001080433]                                     | NM_001080433 | -5.32  |
| A_24_P940469 |                 | alcohol dehydrogenase 1B (class I), beta polypeptide [Source:HGNC Symbol;Acc:250] [ENST00000305046]               | AF153821     | -5.53  |
| A_23_P58359  | <i>ADH1A</i>    | Homo sapiens alcohol dehydrogenase 1A (class I), alpha polypeptide (ADH1A), mRNA [NM_000667]                      | NM_000667    | -5.53  |
| A_24_P291658 | <i>ADH1A</i>    | Homo sapiens alcohol dehydrogenase 1A (class I), alpha polypeptide (ADH1A), mRNA [NM_000667]                      | NM_000667    | -5.62  |
| A_23_P56197  | <i>CRLF1</i>    | Homo sapiens cytokine receptor-like factor 1 (CRLF1), mRNA [NM_004750]                                            | NM_004750    | -5.95  |
| A_23_P11674  | <i>PTGFR</i>    | Homo sapiens prostaglandin F receptor (FP) (PTGFR), transcript variant 2, mRNA [NM_001039585]                     | NM_001039585 | -5.99  |
| A_23_P40415  | <i>ADAMTS5</i>  | Homo sapiens ADAM metalloproteinase with thrombospondin type 1 motif, 5 (ADAMTS5), mRNA [NM_007038]               | NM_007038    | -6.27  |
| A_23_P81158  | <i>ADH1C</i>    | Homo sapiens alcohol dehydrogenase 1C (class I), gamma polypeptide (ADH1C), mRNA [NM_000669]                      | NM_000669    | -6.63  |
| A_23_P253896 | <i>NPNT</i>     | Homo sapiens nephronectin (NPNT), mRNA [NM_001033047]                                                             | NM_001033047 | -6.75  |
| A_24_P940166 | <i>PAPSS2</i>   | Homo sapiens 3'-phosphoadenosine 5'-phosphosulfate synthase 2 (PAPSS2), transcript variant 2, mRNA [NM_001015880] | NM_001015880 | -6.88  |
| A_24_P302172 | <i>PTGFR</i>    | Homo sapiens prostaglandin F receptor (FP) (PTGFR), transcript variant 2, mRNA [NM_001039585]                     | NM_001039585 | -7.04  |
| A_23_P151805 | <i>FBLN5</i>    | Homo sapiens fibulin 5 (FBLN5), mRNA [NM_006329]                                                                  | NM_006329    | -7.16  |
| A_24_P139152 | <i>COL8A1</i>   | collagen, type VIII, alpha 1 [Source:HGNC Symbol;Acc:2215] [ENST00000261037]                                      | AL359062     | -7.73  |
| A_32_P735429 |                 | RNSAP seum amyloid P component (Rattus norvegicus) (exp=-1; wqp=0; cg=0), partial (30%) [THC2654992]              |              | -7.88  |
| A_23_P330611 | <i>WIPF1</i>    | Homo sapiens WAS/WASL interacting protein family, member 1 (WIPF1), transcript variant 2, mRNA                    | NM_001077269 | -8.04  |
| A_23_P34597  | <i>CDA</i>      | Homo sapiens cytidine deaminase (CDA), mRNA [NM_001785]                                                           | NM_001785    | -8.11  |
| A_23_P43164  | <i>SULF1</i>    | Homo sapiens sulfatase 1 (SULF1), transcript variant 3, mRNA [NM_015170]                                          | NM_015170    | -10.08 |
| A_23_P102611 | <i>WISP2</i>    | Homo sapiens WNT1 inducible signaling pathway protein 2 (WISP2), mRNA [NM_003881]                                 | NM_003881    | -11.46 |
| A_23_P214208 | <i>CNR1</i>     | Homo sapiens cannabinoid receptor 1 (brain) (CNR1), transcript variant 2, mRNA [NM_033181]                        | NM_033181    | -11.89 |
| A_23_P102000 | <i>CXCR4</i>    | Homo sapiens chemokine (C-X-C motif) receptor 4 (CXCR4), transcript variant 1, mRNA [NM_001008540]                | NM_001008540 | -12.66 |
