# Supplementary material for: Loss of the BRCA1-Interacting Helicase BRIP1 Results in Abnormal Mammary Acinar Morphogenesis
Source: PubMed Central journal article supplement (PMC3765252; doi:10.1371/journal.pone.0074013), 2013-09-06
Supplement: pone.0074013.s006.pdf [file pone.0074013.s006.pdf]

**Table S4. Gene Set Enrichment Analysis (GSEA) gene sets positively or negatively correlated with 3D cultured *BRIP1*-knockdown cells compared with control cells**  
ES, GSEA enrichment score; NES, GSEA normalized enrichment score; FDR, false discovery rate. Only gene sets that show  $P < 0.05$  and  $FDR < 0.25$  are listed.

| No.                                                                                                  | Database     | Name of Gene Set                                   | Size (number of genes) | ES     | NES    | Nominal<br>P-value | FDR<br>q-value |
|------------------------------------------------------------------------------------------------------|--------------|----------------------------------------------------|------------------------|--------|--------|--------------------|----------------|
| <b>Gene sets positively correlated with <i>BRIP1</i>-knockdown cells compared with control cells</b> |              |                                                    |                        |        |        |                    |                |
| 1                                                                                                    | Curated (C2) | UVB_NHEK4_24HRS_DN                                 | 16                     | 0.745  | 2.019  | 0.002              | 0.012          |
| 2                                                                                                    | Curated (C2) | HINATA_NFKB_DN                                     | 19                     | 0.742  | 1.844  | 0.000              | 0.113          |
| 3                                                                                                    | Curated (C2) | TSA_CD4_UP                                         | 25                     | 0.601  | 1.792  | 0.004              | 0.166          |
| 4                                                                                                    | Curated (C2) | CROMER_HYPOPHARYNGEAL_MET_VS_NON_DN                | 77                     | 0.579  | 1.750  | 0.002              | 0.215          |
| 5                                                                                                    | Curated (C2) | VEGF_HUVEC_2HRS_UP                                 | 29                     | 0.597  | 1.742  | 0.006              | 0.190          |
| 6                                                                                                    | Curated (C2) | PTDINSPATHWAY                                      | 21                     | 0.622  | 1.741  | 0.014              | 0.161          |
| 7                                                                                                    | Curated (C2) | ET743_SARCOMA_6HRS_UP                              | 28                     | 0.519  | 1.732  | 0.004              | 0.155          |
| 8                                                                                                    | Curated (C2) | UVB_NHEK4_6HRS_UP                                  | 27                     | 0.655  | 1.731  | 0.000              | 0.139          |
| 9                                                                                                    | Curated (C2) | HSA03010_RIBOSOME                                  | 64                     | 0.486  | 1.710  | 0.030              | 0.159          |
| 10                                                                                                   | Curated (C2) | UVB_NHEK3_C8                                       | 64                     | 0.497  | 1.697  | 0.006              | 0.171          |
| 11                                                                                                   | Curated (C2) | ATMPATHWAY                                         | 20                     | 0.634  | 1.691  | 0.002              | 0.169          |
| 12                                                                                                   | Curated (C2) | BLEO_HUMAN_LYMPH_HIGH_4HRS_UP                      | 21                     | 0.745  | 1.678  | 0.020              | 0.180          |
| 13                                                                                                   | Curated (C2) | AGED_MOUSE_RETINA_ANY_UP                           | 20                     | 0.543  | 1.675  | 0.012              | 0.172          |
| 14                                                                                                   | Curated (C2) | HDACI_COLON_CURSUL_UP                              | 39                     | 0.505  | 1.661  | 0.008              | 0.187          |
| 15                                                                                                   | Curated (C2) | MMS_HUMAN_LYMPH_HIGH_24HRS_UP                      | 19                     | 0.692  | 1.653  | 0.008              | 0.193          |
| 16                                                                                                   | Curated (C2) | UVC_HIGH_ALL_UP                                    | 15                     | 0.724  | 1.648  | 0.015              | 0.192          |
| 17                                                                                                   | Curated (C2) | KANNAN_P53_UP                                      | 37                     | 0.624  | 1.645  | 0.018              | 0.187          |
| 18                                                                                                   | Curated (C2) | FERRANDO_T_CELL_DIFFERENTIATION_PATHWAY            | 16                     | 0.555  | 1.630  | 0.035              | 0.210          |
| 19                                                                                                   | Curated (C2) | UVB_NHEK4_6HRS_DN                                  | 18                     | 0.582  | 1.623  | 0.006              | 0.213          |
| 20                                                                                                   | Curated (C2) | HSA05131_PATHOGENIC_ESCHERICHIA_COLI_INFECTION_EPE | 38                     | 0.515  | 1.600  | 0.022              | 0.249          |
| 21                                                                                                   | Curated (C2) | ERKPATHWAY                                         | 29                     | 0.541  | 1.598  | 0.031              | 0.245          |
| 22                                                                                                   | Curated (C2) | NI2_MOUSE_UP                                       | 40                     | 0.473  | 1.596  | 0.016              | 0.238          |
| <b>Gene sets negatively correlated with <i>BRIP1</i>-knockdown cells compared with control cells</b> |              |                                                    |                        |        |        |                    |                |
| 23                                                                                                   | Curated (C2) | PROSTAGLANDIN_SYNTHESIS_REGULATION                 | 28                     | -0.625 | -1.979 | 0.000              | 0.018          |
| 24                                                                                                   | Curated (C2) | SA_PTEN_PATHWAY                                    | 17                     | -0.651 | -1.785 | 0.002              | 0.149          |
| 25                                                                                                   | Curated (C2) | HSA00530_AMINOSUGARS_METABOLISM                    | 26                     | -0.628 | -1.728 | 0.004              | 0.197          |
| 26                                                                                                   | Curated (C2) | STARCH_AND_SUCROSE_METABOLISM                      | 29                     | -0.551 | -1.721 | 0.008              | 0.161          |
| 27                                                                                                   | Curated (C2) | HSA00040_PENTOSE_AND_GLUCURONATE_INTERCONVERSIO    | 16                     | -0.575 | -1.689 | 0.014              | 0.190          |
| 28                                                                                                   | Curated (C2) | CCR5PATHWAY                                        | 17                     | -0.571 | -1.670 | 0.027              | 0.200          |
| 29                                                                                                   | Curated (C2) | ANDROGEN_AND_ESTROGEN_METABOLISM                   | 21                     | -0.491 | -1.655 | 0.012              | 0.200          |
| 30                                                                                                   | Curated (C2) | SMALL_LIGAND_GPCRS                                 | 17                     | -0.629 | -1.632 | 0.028              | 0.218          |
| 31                                                                                                   | Curated (C2) | INOSITOL_PHOSPHATE_METABOLISM                      | 21                     | -0.618 | -1.620 | 0.014              | 0.217          |
| 32                                                                                                   | Curated (C2) | GLYCOLYSIS                                         | 50                     | -0.383 | -1.585 | 0.008              | 0.231          |
| 33                                                                                                   | Curated (C2) | TYROSINE_METABOLISM                                | 31                     | -0.526 | -1.579 | 0.027              | 0.226          |
