# Supplementary material for: Loss of the BRCA1-Interacting Helicase BRIP1 Results in Abnormal Mammary Acinar Morphogenesis
Source: PubMed Central journal article supplement (PMC3765252; doi:10.1371/journal.pone.0074013), 2013-09-06
Supplement: pone.0074013.s007.pdf [file pone.0074013.s007.pdf]

**Table S5. Oligonucleotide sequences used for quantitative RT-PCR**

| <b>Gene</b>   | <b>Forward (5' to 3')</b> | <b>Reverse (5' to 3')</b> |
|---------------|---------------------------|---------------------------|
| <i>SATB1</i>  | AGGAAATGAAGCGTGCTAAAGTG   | AGAGGTTCTCCCACAGGGTTC     |
| <i>RICH2</i>  | CTGTGCAGGGACTCAACCAG      | AATCGGTGCCAGCTTCTTTG      |
| <i>PCSK5</i>  | ATGGGAGATGCGTGCAGAG       | CACTAGGGCAGCTTGTACAGTTCTT |
| <i>ELF3</i>   | GAACAGCAACATGACCTACGAGA   | TGGAGAACCTCTTCCTCCTTCC    |
| <i>WIPF1</i>  | AGCAAACCTGGCAAGAAACGAA    | GGGTAGAGAAGAGCAGGCAAAG    |
| <i>MCAM</i>   | CAGAAGAGATGGGCCTCCTG      | CAGGGAAGGGAGCTGAAGTG      |
| <i>COL8A1</i> | TGGCAAAGAGTATCCACACCTACC  | TTCCCCTCGTAAACTGGCTAATG   |
| <i>GAS1</i>   | GCGAGTCGGTCAAGGAGAA       | CGTCATCGTAGTCCTCATCGTAG   |
